## 1 Title

2 Extensive Horizontal Gene Transfer in Cheese-Associated Bacteria

## 3 Author Names and Affiliations

4 Kevin S. Bonham<sup>1</sup>, Benjamin E. Wolfe<sup>2</sup>, Rachel J. Dutton<sup>1,3</sup>.

5 (1) Division of Biological Sciences, University of California, San Diego, La Jolla, CA,

6 (2) Department of Biology, Tufts University, Medford, MA

7 (3) Center for Microbiome Innovation, Jacobs School of Engineering, University of California,  
8 San Diego, La Jolla, CA

## 9 Abstract

10 Acquisition of genes through horizontal gene transfer (HGT) allows microbes to rapidly gain new  
11 capabilities and adapt to new or changing environments. Identifying widespread HGT regions  
12 within multispecies microbiomes can pinpoint the molecular mechanisms that play key roles in  
13 microbiome assembly. We sought to identify horizontally transferred genes within a model  
14 microbiome, the cheese rind. Comparing 31 newly-sequenced and 134 previously sequenced  
15 bacterial isolates from cheese rinds, we identified over 200 putative horizontally transferred  
16 genomic regions containing 4,733 protein coding genes. The largest of these regions are  
17 enriched for genes involved in siderophore acquisition, and are widely distributed in cheese  
18 rinds in both Europe and the US. These results suggest that horizontal gene transfer (HGT) is  
19 prevalent in cheese rind microbiomes, and the identification of genes that are frequently  
20 transferred in a particular environment may provide insight into the selective forces shaping  
21 microbial communities.

## 22 Introduction

23 Great strides have been made in characterizing the composition of microbiomes, and in  
24 understanding their importance in the ecology of natural systems, in agriculture and in human  
25 health. However, despite these advances, the forces that shape the diversity, structure, and  
26 function of microbiomes remain poorly understood [1]. Investigating these underlying  
27 mechanisms *in situ* is difficult, since observational and sequenced-based analysis rarely  
28 enables causal conclusions [2]. Replicating microbial communities *in vitro* is also an enormous  
29 challenge, due to high levels of diversity and the difficulties in establishing pure cultures of most  
30 bacterial species. These obstacles significantly hamper our ability to move from observations of  
31 microbial diversity to the molecular mechanisms shaping key processes such as species  
32 interactions and microbial evolution.

33 Horizontal gene transfer (HGT) is a major force in microbial evolution and can lead to the  
34 wholesale acquisition of novel functions. In some cases, these novel functions can have  
35 significant adaptive consequences, such as in the transfer of antibiotic resistance genes [3].  
36 HGT also allows rapid adaptation to new niches [4], since ecologically relevant genes may be  
37 acquired by species not previously adapted to a particular niche [5,6]. The movement of  
38 microbes to new environments has been shown to increase both the rate and impact of HGT,  
39 and HGT is most frequent for genes under positive selection [7]. In moving to a new  
40 environment, microbes can face novel abiotic conditions (temperature, moisture, salinity, pH,  
41 and nutrients) and novel biotic challenges and opportunities due to the presence of microbial  
42 neighbors.

43 Evaluating HGT within the context of microbial communities has the potential to uncover new  
44 insights concerning the extent, mechanisms, and ecological impact of this important process.  
45 Advances in genome sequencing have begun to provide a glimpse into HGT within  
46 environmentally, medically and economically important microbiomes [8,9]. For example,  
47 extensive gene sharing has been observed throughout the commensal human microbiome  
48 [6,10]), including genes that enable nutrient acquisition from novel food sources [6,10], and  
49 pathogenicity islands and antibiotic resistance genes in pathogenic microbes [11–13]. Other  
50 natural habitats, such as soil ([Coombs and Barkay 2004](#); [Heuer and Smalla 2012](#)) and aquatic  
51 environments ([McDaniel et al. 2010](#); [Frischer et al. 1994](#)) also show evidence of extensive HGT.  
52 While these studies offer valuable insights into the frequency and potential impact of genes that  
53 can be transferred in microbial communities, the complexity of these systems makes further  
54 examination of the effects of these HGT events on their evolution and ecology difficult.

55 The microbial communities of fermented foods experience strong selection as a result of  
56 growing in novel, human-made environments. Previous work has demonstrated that HGT can  
57 be a major driver of adaptation in food systems and other human-managed environments [9,14].  
58 Prior analysis of microbial species from cheese have revealed several instances of HGT in this  
59 environment. Lactic acid bacteria (LAB) such as *Lactobacillus* and *Lactococcus*, which are used  
60 in the initial fermentation of milk, are known to harbor antibiotic resistance genes and may be  
61 reservoirs for transfer to pathogenic enterococci [15,16] and other pathogenic microbes. Other  
62 food-associated bacteria may also contribute to antibiotic resistance gene transfer [17–19]. In  
63 yogurt, another dairy ferment utilizing LAB, HGT of metabolic genes between protooperative  
64 species *L. bulgaricus* and *S. thermophilus* has been observed [20,21]. Sequencing of  
65 *Penicillium* species isolated from the cheese-making environment identified HGT of large  
66 genomic islands between these key fungal inhabitants of cheese [22–24].

67 During the aging of traditional styles of cheese in caves or aging rooms, bacteria and fungi form  
68 a multi-species biofilm called the rind [25]. We have previously shown that these communities  
69 can be used to examine community-based processes, such as succession and interspecies  
70 interactions, within an experimentally tractable system [26,27]. Given that biofilms such as these  
71 are densely populated, and microbes in cheese rinds are under strong selection to obtain limited  
72 nutrients (e.g. free amino acids, iron) as well as tolerate cell stress [28], we predicted that HGT  
73 might be widespread in cheese rind microbiomes and therefore might provide a useful  
74 experimental model for HGT within microbial communities.

75 We sought to determine the diversity, distribution, and functional content of HGT in bacterial  
76 species isolated from cheese rinds. Specifically, we predicted that 1) HGT would be  
77 widespread, 2) that HGT genes would be enriched for functions related to survival in cheese  
78 environment, and 3) that there would be uneven distribution of HGT events across taxa. We  
79 analyzed the genomes of newly isolated and sequenced cheese-associated bacterial species  
80 (31 genomes) and those available in public databases (134 additional genomes). We present  
81 data which suggests that there has been extensive HGT in cheese-associated bacteria. The  
82 regions of DNA identified appear to encode a number of functions which would be expected to  
83 provide adaptive advantages within the cheese environment. In particular, we identified three  
84 large multi-gene islands that are shared within multiple Actinobacteria, Proteobacteria and  
85 Firmicutes species respectively. These genomic regions are not related, but appear to have  
86 analogous functions involving iron acquisition, and are widely distributed in geographically  
87 distant cheeses. This work provides foundational knowledge in an experimentally-tractable  
88 system in which future work can help to provide insight on the role of HGT within microbiomes.

## 89 Results

### 90 Identification of putative horizontally transferred regions

91 To establish a diverse database of cheese-associated bacterial genomes, we isolated species  
92 from cheese samples collected as part of previous work [26]. A total of 31 isolates, representing  
93 4 bacterial phyla and 11 genera, were selected for genome sequencing using Illumina and  
94 PacBio (Supplementary Table 1). Recently, a large collection of cheese-associated bacterial  
95 genomes were sequenced [29], which allowed us to include additional genomes in our analysis.  
96 Our isolates were from cheeses produced in the United States, Spain, Italy and France, while  
97 the Almeida et al. collection was almost exclusively from France. We also included genomes  
98 from the NCBI reference sequence (RefSeq) database that are associated with cheese, for a  
99 total of 165 bacterial genomes.

100 We next developed a computational pipeline for the identification of putative horizontally  
101 transferred genes adapted from work on the human microbiome [10]. We built a central BLAST  
102 database containing all ORFs from all cheese-associated genomes. For each gene in each  
103 genome, we performed BLAST against this database, and compiled a list of hits (Figure 1-figure  
104 supplement 1, Materials and Methods). For each hit, we examined the length and percent  
105 identity of aligned regions. Closely related species will have many nearly identical genes due to  
106 vertical inheritance. To avoid capturing these genes in our analysis, we determined the pairwise  
107 average nucleotide identity (ANI) between species within the same genus [30,31]. ANI provides  
108 a measure of the overall similarity of two genomes. We tested varying thresholds for length and  
109 ANI in order to examine the effects of these parameters on the results (Supplementary Table 3).  
110 Higher maximum ANI cutoffs and shorter lengths are more likely to yield false positives, since  
111 closely related species are more likely to share short stretches of high nucleotide identity. At the  
112 same time, a lower maximum ANI cutoff may exclude legitimate HGT events, especially  
113 considering that closely related species are also more likely to engage in HGT. Based on our  
114 most conservative gene identity parameters (minimum 99% identity over 500 nucleotides), we

115 identified at least one putative horizontally transferred gene in 130/165 cheese-associated  
116 species in the analysis, for a total of 4,733 genes (Figure 1A, Supplementary Table 4). At least  
117 one putative HGT protein coding gene was found in 130 out of 165 species (78.8%). Because  
118 this analysis depends on the species included for comparison, this list of HGT is almost certainly  
119 an underestimate.

120 Since multiple genes can be transferred in a single HGT event, we next assembled the putative  
121 HGT genes into groups based on genomic proximity. Individual coding sequences (CDS) for  
122 each species were grouped into islands if they were found within 5000 nucleotides of one  
123 another on the same contig. These islands were then clustered with islands in other species if  
124 they shared at least one CDS in common. The 4,733 genes clustered into 264 individual groups  
125 (Figure 1B, Supplementary Table 4). Mobile elements such as transposons complicate our  
126 method of group clustering, since non-contiguous islands may be grouped together if they share  
127 a common transposon. Indeed, this appears to have occurred with Group 1, which contains  
128 genes from several disparate genomic regions. In other cases, a single species may have  
129 genes in a single group spread across multiple contigs (Figure 2- figure supplement 1), but this  
130 may accurately represent a single HGT event.

131 Most HGT groups we identified (231, 87.5%) contain only members of the same phylum, or  
132 even a single genus (183 or 69%, Supplementary Table 4). This supports previous studies that  
133 suggest that HGT is most prevalent among closely related species [32]. However, we  
134 uncovered several notable exceptions. For example, *Alkaiobacterium kapii* FAM208.38, a  
135 Firmicute, has a substantial (~8kb) fraction of Group 1, which is predominantly found in  
136 *Actinobacteria* species. Groups 2 and 3 each have hits found in 3 different phyla (though both  
137 are predominantly found in Actinobacteria).

## 138 Functions encoded in HGT regions

139 HGT can enable rapid evolution of microbes entering a new environment, and genes that are  
140 under positive selection are observed more frequently [4]. Identifying the functions of genes that  
141 are frequently transferred may provide a window into the selective forces that are most  
142 important for adapting to the cheese rind environment. Across all of the genes identified in our  
143 analysis, the most abundant gene functions are transposases, conjugal transfer genes, phage-  
144 related proteins and other mobile elements (631/4733 or 13% of all protein coding sequences).  
145 A third (86/264 or 32.6%) of all HGT groups contain mobile elements. These genetic elements  
146 are likely involved in either directly or indirectly in the mobilization and transfer of DNA.

147 In order to determine if gene functions other than mobile elements are enriched in identified  
148 HGT regions, we used BlastKOALA [33] to assign KEGG functional annotations (Figure 1C,  
149 Figure 2, supplementary Table 3). Approximately half (53%) of genes could not be assigned  
150 KEGG annotations. Of the KEGG-annotated genes, the most frequent module (281/2264 or  
151 11%) was “metal ion, iron siderophore and vitamin B12 transport systems”. Five of the ten  
152 largest HGT groups as measured by total number of genes (Groups 1, 2, 3, 7 and 8) contain  
153 siderophore transport systems (K02013-K02016). Low availability of iron in cheese is known to  
154 limit the growth of several bacterial species [34,35]. Previous work has also shown that genes

## Figure 1

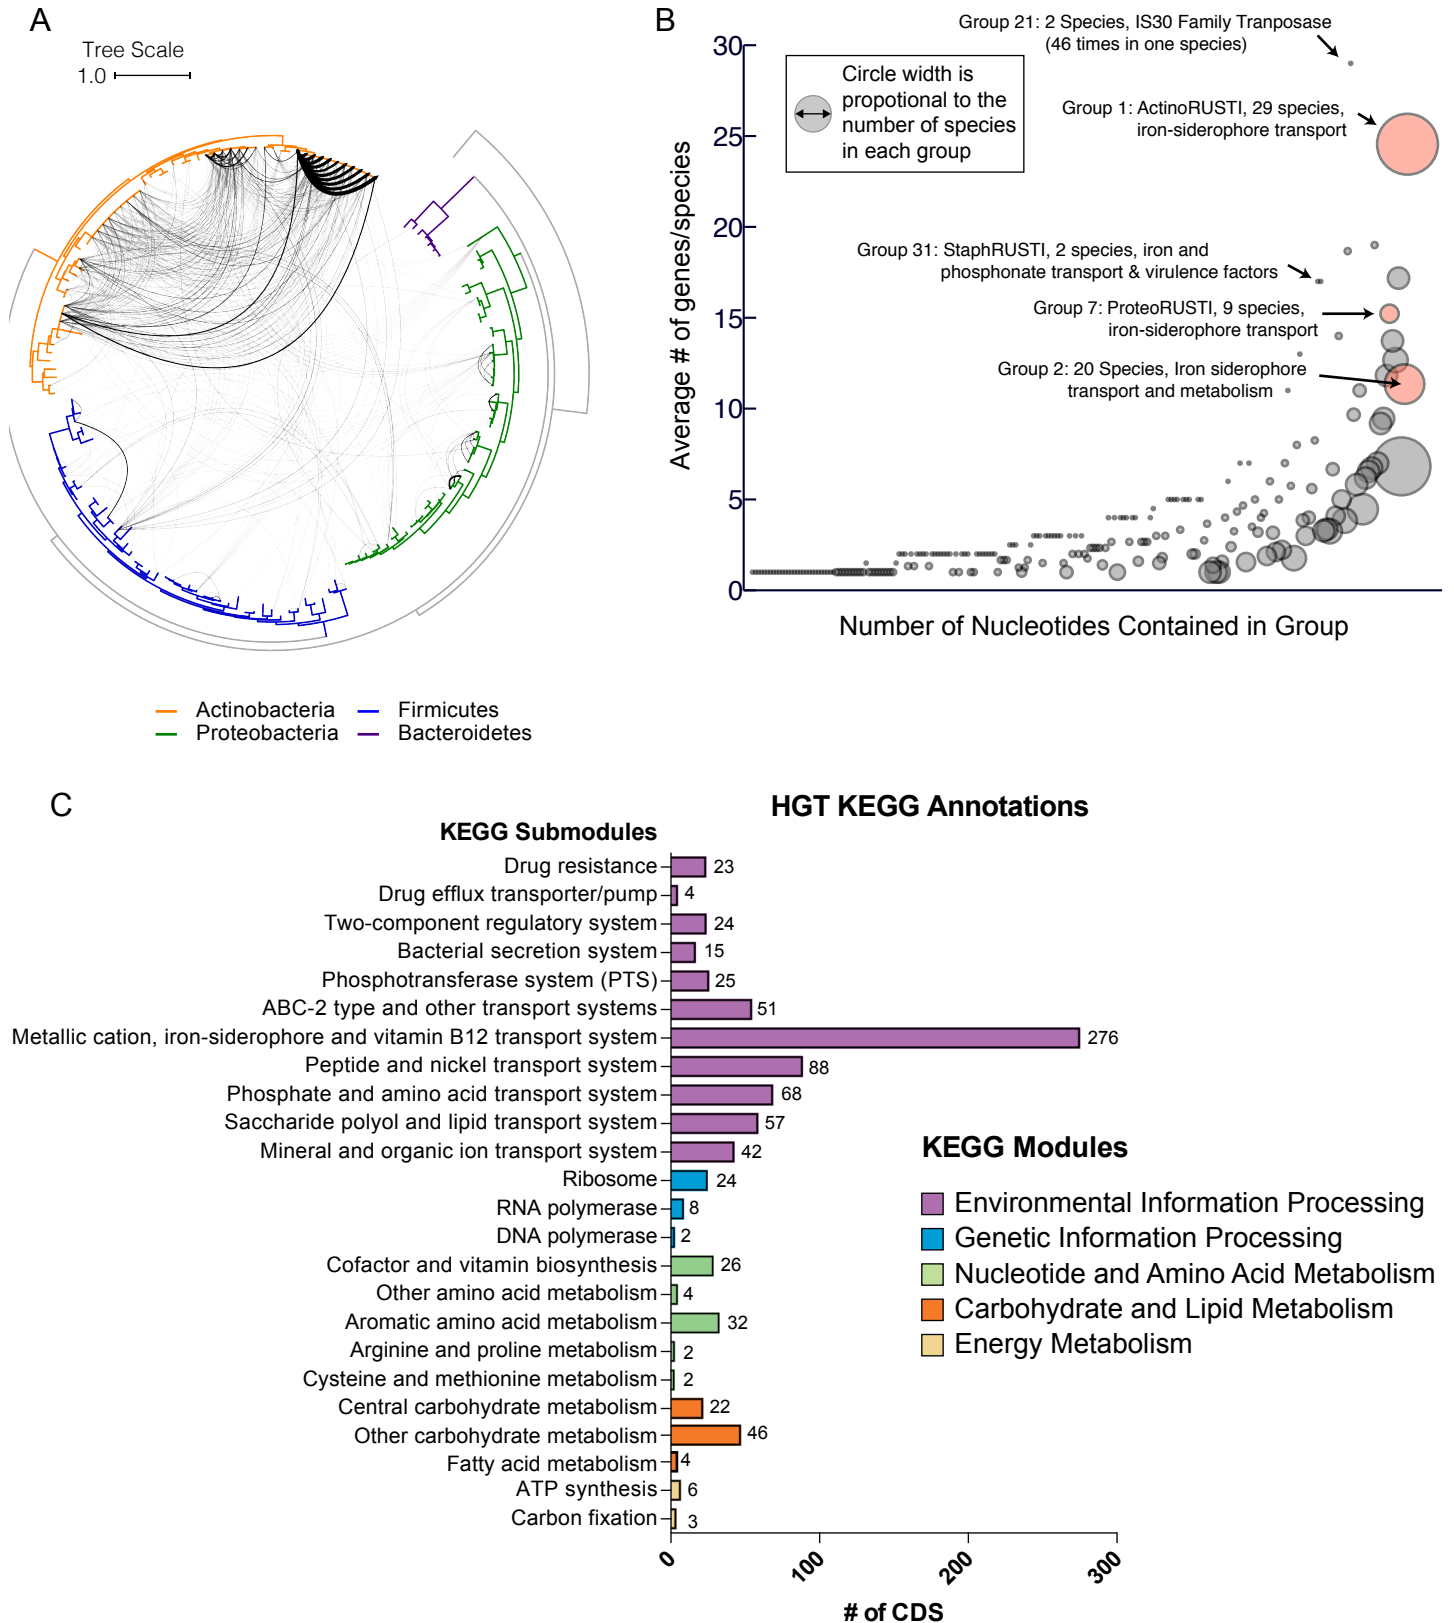

**Figure 1: Extensive Horizontal Gene Transfer in the Cheese Microbiome**

(A) All HGT events in analyzed cheese-associated bacteria. Connection thickness is scaled to # of shared protein coding sequences. Maximum likelihood Phylogenetic tree based on 16S RNA alignment using Ribosomal Database Project (RDP). (B) HGT events clustered into 264 "groups" based on genomic proximity. Groups are plotted based on total nucleotide content (x-axis, from low to high), and the mMean number of genes per species (y-axis) in HGT groups. Diameter of each circle is proportional to the total number of species in the group. Groups highlighted in red are described further in the text. (C) Quantification of KEGG modules and submodules for protein coding genes (CDS) identified as horizontally transferred. Annotations were generated by BLAST-Koala. Genes without function prediction are not depicted.

155 involved in iron acquisition are present in higher numbers in cheese-associated species  
156 compared to closely related species from other environment [35,36].

157 Many other horizontally transferred genes (267/2264 or 12% of KEGG annotated genes) are  
158 also involved in the transport of nutrients relevant for growth in the cheese environment. Lactate  
159 is an abundant carbon source in freshly-made cheese, since the initial stages of cheesemaking  
160 involve the fermentation of lactose to lactate by lactic acid bacteria [25]. We observe a large  
161 number of genes (63/2264 or 2.8% of KEGG annotated genes) involved in lactate import  
162 (lactate permease - K03303) or lactate metabolism. Lactate dehydrogenase (K00101), which  
163 reduces lactate to pyruvate, represented nearly 1% of all horizontally transferred protein coding  
164 sequences.

165 Apart from lactate, the primary source of energy for microbial growth in cheese would be  
166 derived from metabolism of the abundant lipids and proteins, particularly casein [28]. Glutamate  
167 importers (43/2264 or 1.9%, eg. K12942, K10005-K10008) and short peptide/nickel transporters  
168 (88/2264 or 3.9% eg. K03305) were identified, suggesting pathways for utilization of casein  
169 degradation products. Transporters for micronutrients, including phosphonate (K05781,  
170 K06163-K06165), molybdate (K02017, K02019, K02020, K03750, K03750, K03639), and metal  
171 ions like zinc and manganese were also identified.

172 HGT of drug resistance genes is of particular concern, since mobile resistance genes from food-  
173 associated microbes may be transferred to animal- and human-associated microbes [14].  
174 Cheese rind communities frequently contain filamentous fungi including *Penicillium* species and  
175 other microbes that could potentially produce antimicrobial compounds and thus select for  
176 antibiotic resistance in co-occurring species. However, less than 1% of KEGG-annotated genes  
177 in this dataset are related to drug resistance. A tetracycline resistance gene was identified in 8  
178 *Brevibacterium* species (group 10) and a tripartite multidrug resistance system (K03446,  
179 K03543) in 3 *Pseudomonas* species (group 37).

180 We also noticed a small number of genes that should be part of the core genome and not  
181 expected to be horizontally transferred. For example, group 27 is found in all 10 strains of *B.*  
182 *linens* in this dataset, as well as the closely related *B. antiquum* CNRZ918, and contains the  
183 SSU ribosomal protein S1p, as well as DNA Polymerase 1. It is possible that these results are  
184 false positives since *B. linens* and *B. antiquum* have an ANI ~88%, and these genes are  
185 typically more highly conserved than average. At the same time, other ribosomal genes that  
186 should also be highly-conserved protein coding genes have substantially lower homology  
187 between these species than S1p (Supplementary Table 5). Further, another gene within this  
188 HGT group (SAM-dependent methyltransferase) is not typically highly conserved, but  
189 nevertheless is >99% identical between these *Brevibacterium* species. We cannot exclude the  
190 possibility that this is a false positive, but this may be an example of homologous recombination  
191 facilitated by the high sequence identity of the ribosomal protein gene. Several other groups  
192 also contain ribosomal proteins (42 - L5p and S3p, 180 - L4p, 219 - S3p), but these groups do  
193 not contain any other protein coding genes, and they are clustered with other ribosomal protein  
194 coding genes which is a more typical arrangement.

## Figure 2

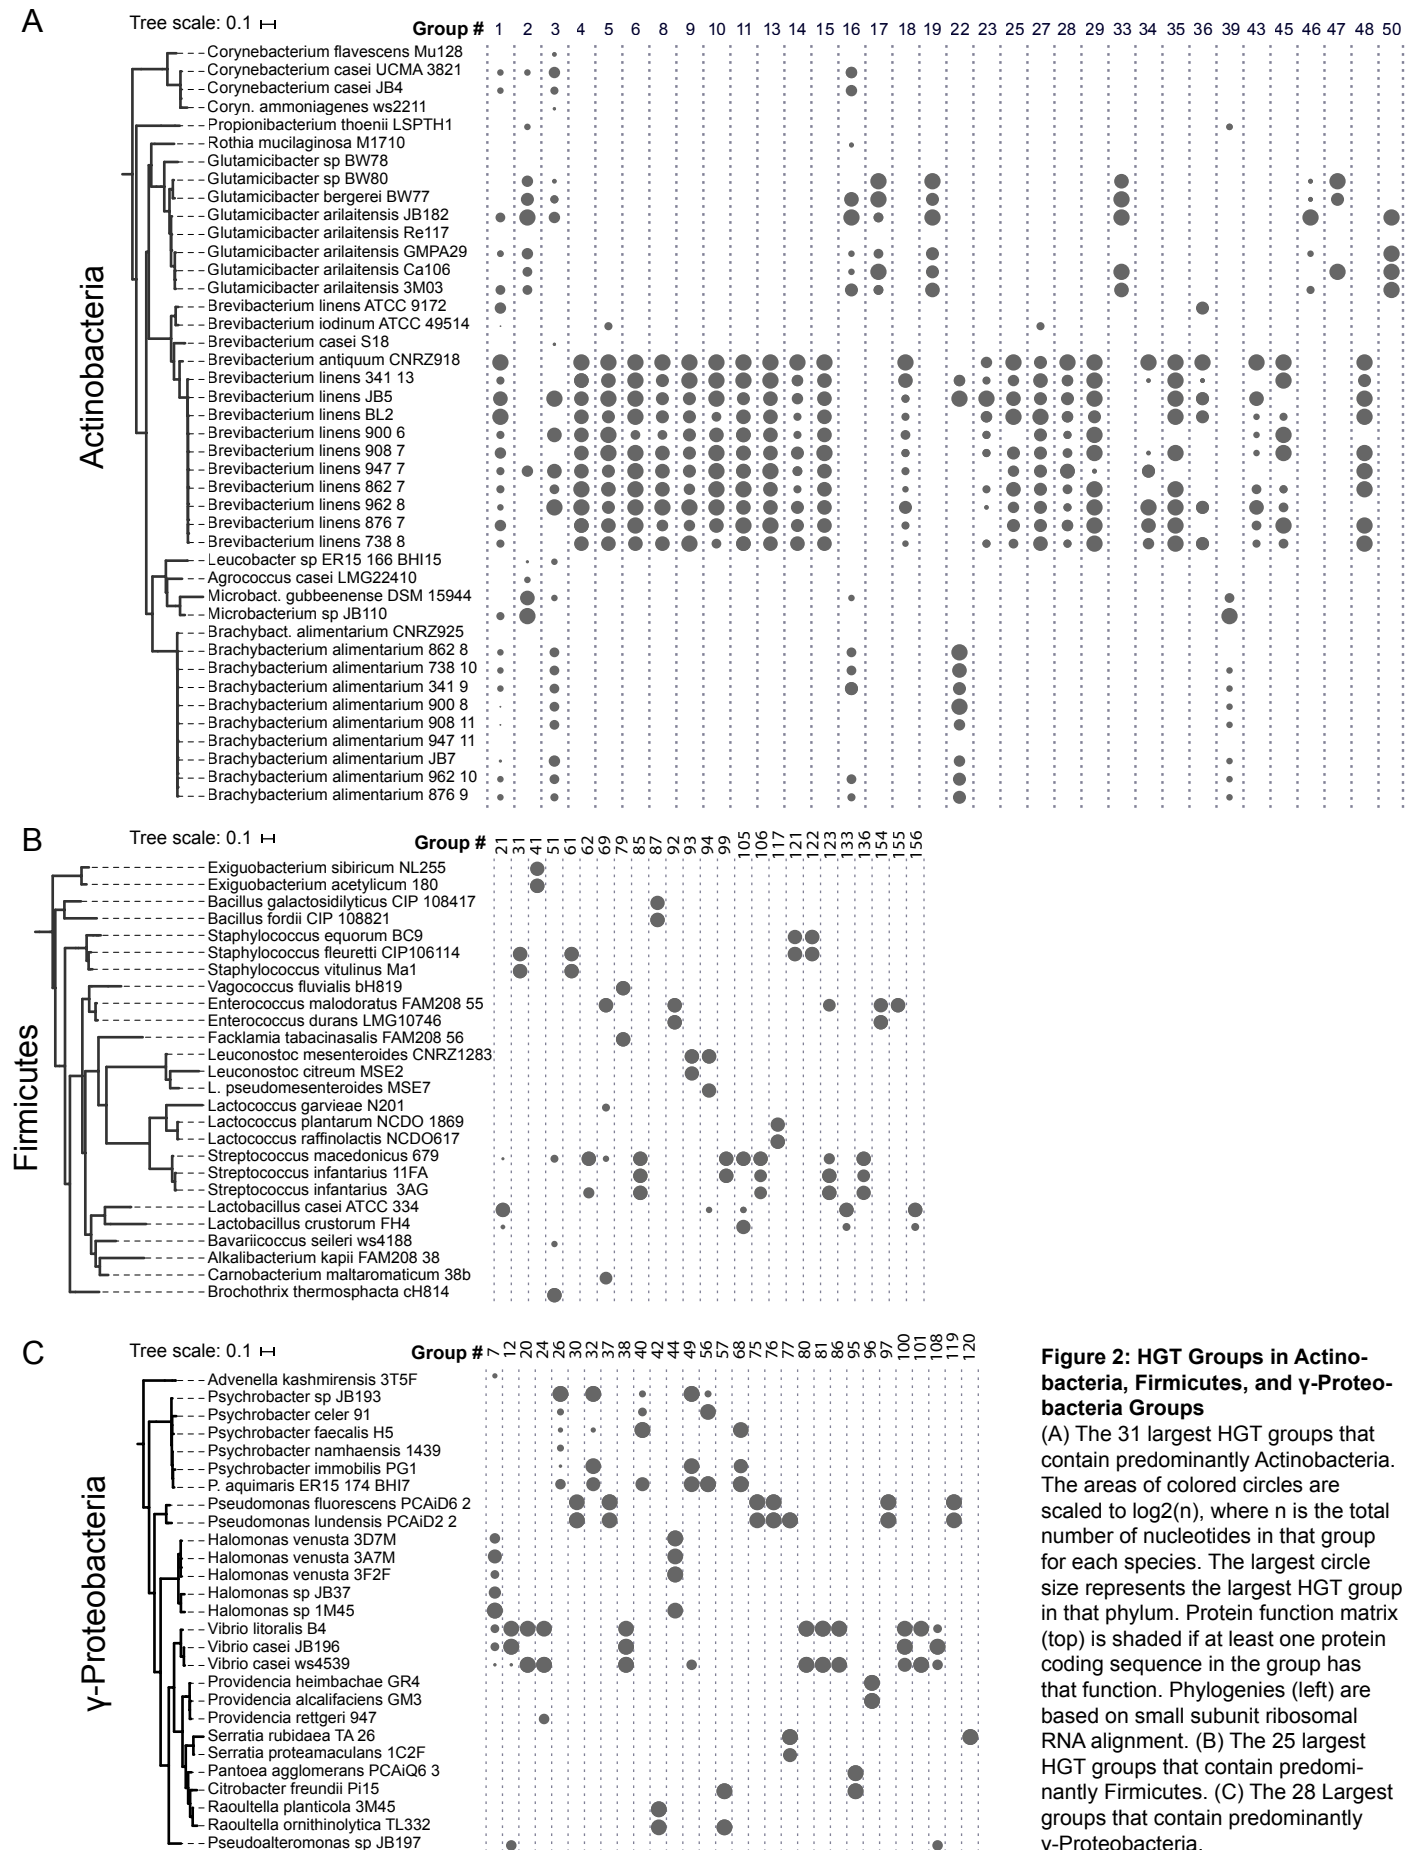

**Figure 2: HGT Groups in Actinobacteria, Firmicutes, and  $\gamma$ -Proteobacteria Groups**

(A) The 31 largest HGT groups that contain predominantly Actinobacteria. The areas of colored circles are scaled to  $\log_2(n)$ , where  $n$  is the total number of nucleotides in that group for each species. The largest circle size represents the largest HGT group in that phylum. Protein function matrix (top) is shaded if at least one protein coding sequence in the group has that function. Phylogenies (left) are based on small subunit ribosomal RNA alignment. (B) The 25 largest HGT groups that contain predominantly Firmicutes. (C) The 28 Largest groups that contain predominantly  $\gamma$ -Proteobacteria.

## 195 Iron Acquisition HGT

196 The abundance of iron acquisition genes identified as HGT suggests that iron is a driving force  
197 in the adaptation to growth on cheese. The largest HGT region we identified in cheese-  
198 associated bacteria, Group 1, includes an island of ~47 kbp (~1% of the genome of *B. linens*  
199 JB5) and 34 genes. This island is found in whole or in part in 15 different species in 5 different  
200 Actinobacterial genera (*Brachybacterium*, *Brevibacterium*, *Corynebacterium*, *Microbacterium*,  
201 and *Glutamicibacter*, formerly *Arthrobacter*), and one Firmicute (*Alkalibacterium*). The core of  
202 this region, flanked by AraC-like transcriptional regulators (eg Ga0099663\_102740 and  
203 Ga0099663\_102753 from JB182), contains several genes predicted to form a siderophore  
204 import complex, including two cell-surface associated substrate binding protein genes  
205 (Ga0099663\_102743-44), two membrane permease genes (Ga0099663\_102745-46), and an  
206 ATPase subunit (Ga0099663\_102747). A siderophore reductase (Ga0099663\_102741) is  
207 present immediately downstream of the AraC regulator, but has less than 99% identityl between  
208 the species we analyzed (Figure 3A, Supplementary Table 3). We named this region **iR**on  
209 **U**ptake/**S**iderophore **T**ransport **I**sland (RUSTI).

210 Horizontally transferred genes are not always expressed in the recipient genome, due to  
211 possible incompatibilities in promoter sequence [3]. Since iron is a limiting resource in cheese  
212 [27,34], we reasoned that if RUSTI is a functional operon, it would likely have increased  
213 expression in the presence of additional competition for iron. In order to assess whether RUSTI  
214 genes are regulated in the presence of competition, we grew *G. arilaitensis* JB182 alone or in  
215 the presence of *Penicillium* and performed RNA sequencing (RNA-seq) to monitor gene  
216 expression. The genes in RUSTI were significantly upregulated in the presence of a competing  
217 microbe relative to growth alone (Figure 3B, Supplementary Table 6), suggesting that this  
218 horizontally transferred region is transcriptionally active and may be responding to competition  
219 for limited iron in cheese.

220 Hundreds of different siderophores have been identified belonging to three major classes:  
221 hydroxamate, catechol and  $\alpha$ -hydroxycarboxylate [37]. In order to predict the function of the  
222 RUSTI transporters, we compared their protein sequences to the Transporter Classification  
223 Database (TCDB) [38] using BLAST (Supplementary Table 7). The two genes annotated as  
224 permease subunits and one gene annotated as an ATP binding subunit each share substantial  
225 homology to the catechol ferric enterobactin transport system (FepD, FepG and FepC  
226 respectively) in *E. coli* [39–41]. Two genes annotated as substrate binding proteins have weak  
227 homology to vibriobactin and iron(III) dicitrate binding proteins from *Vibrio cholerae* and *E. coli*  
228 respectively.

229 Siderophore-related genes are also well-represented in  $\gamma$ -Proteobacterial HGT groups. Like  
230 Group 32 in Actinobacteria, Group 39 contains both siderophore acquisition and siderophore  
231 biosynthesis genes and is found in 3 species of *Psychrobacter*. The HGT group with the most  
232 protein coding genes that we identified in  $\gamma$ -Proteobacteria (group 7) is found in several *Vibrio*  
233 and *Halomonas* species, and like ActinoRUSTI contains an ABC siderophore transport system  
234 with an individual substrate-binding, permease and ATP-binding domains (Figure 3C). Though  
235 this group appears to have analogous function in the acquisition of iron with RUSTI from  
236 Actinobacteria, this ProteoRUSTI does not appear to be related. TCDB analysis suggests



## Figure 3

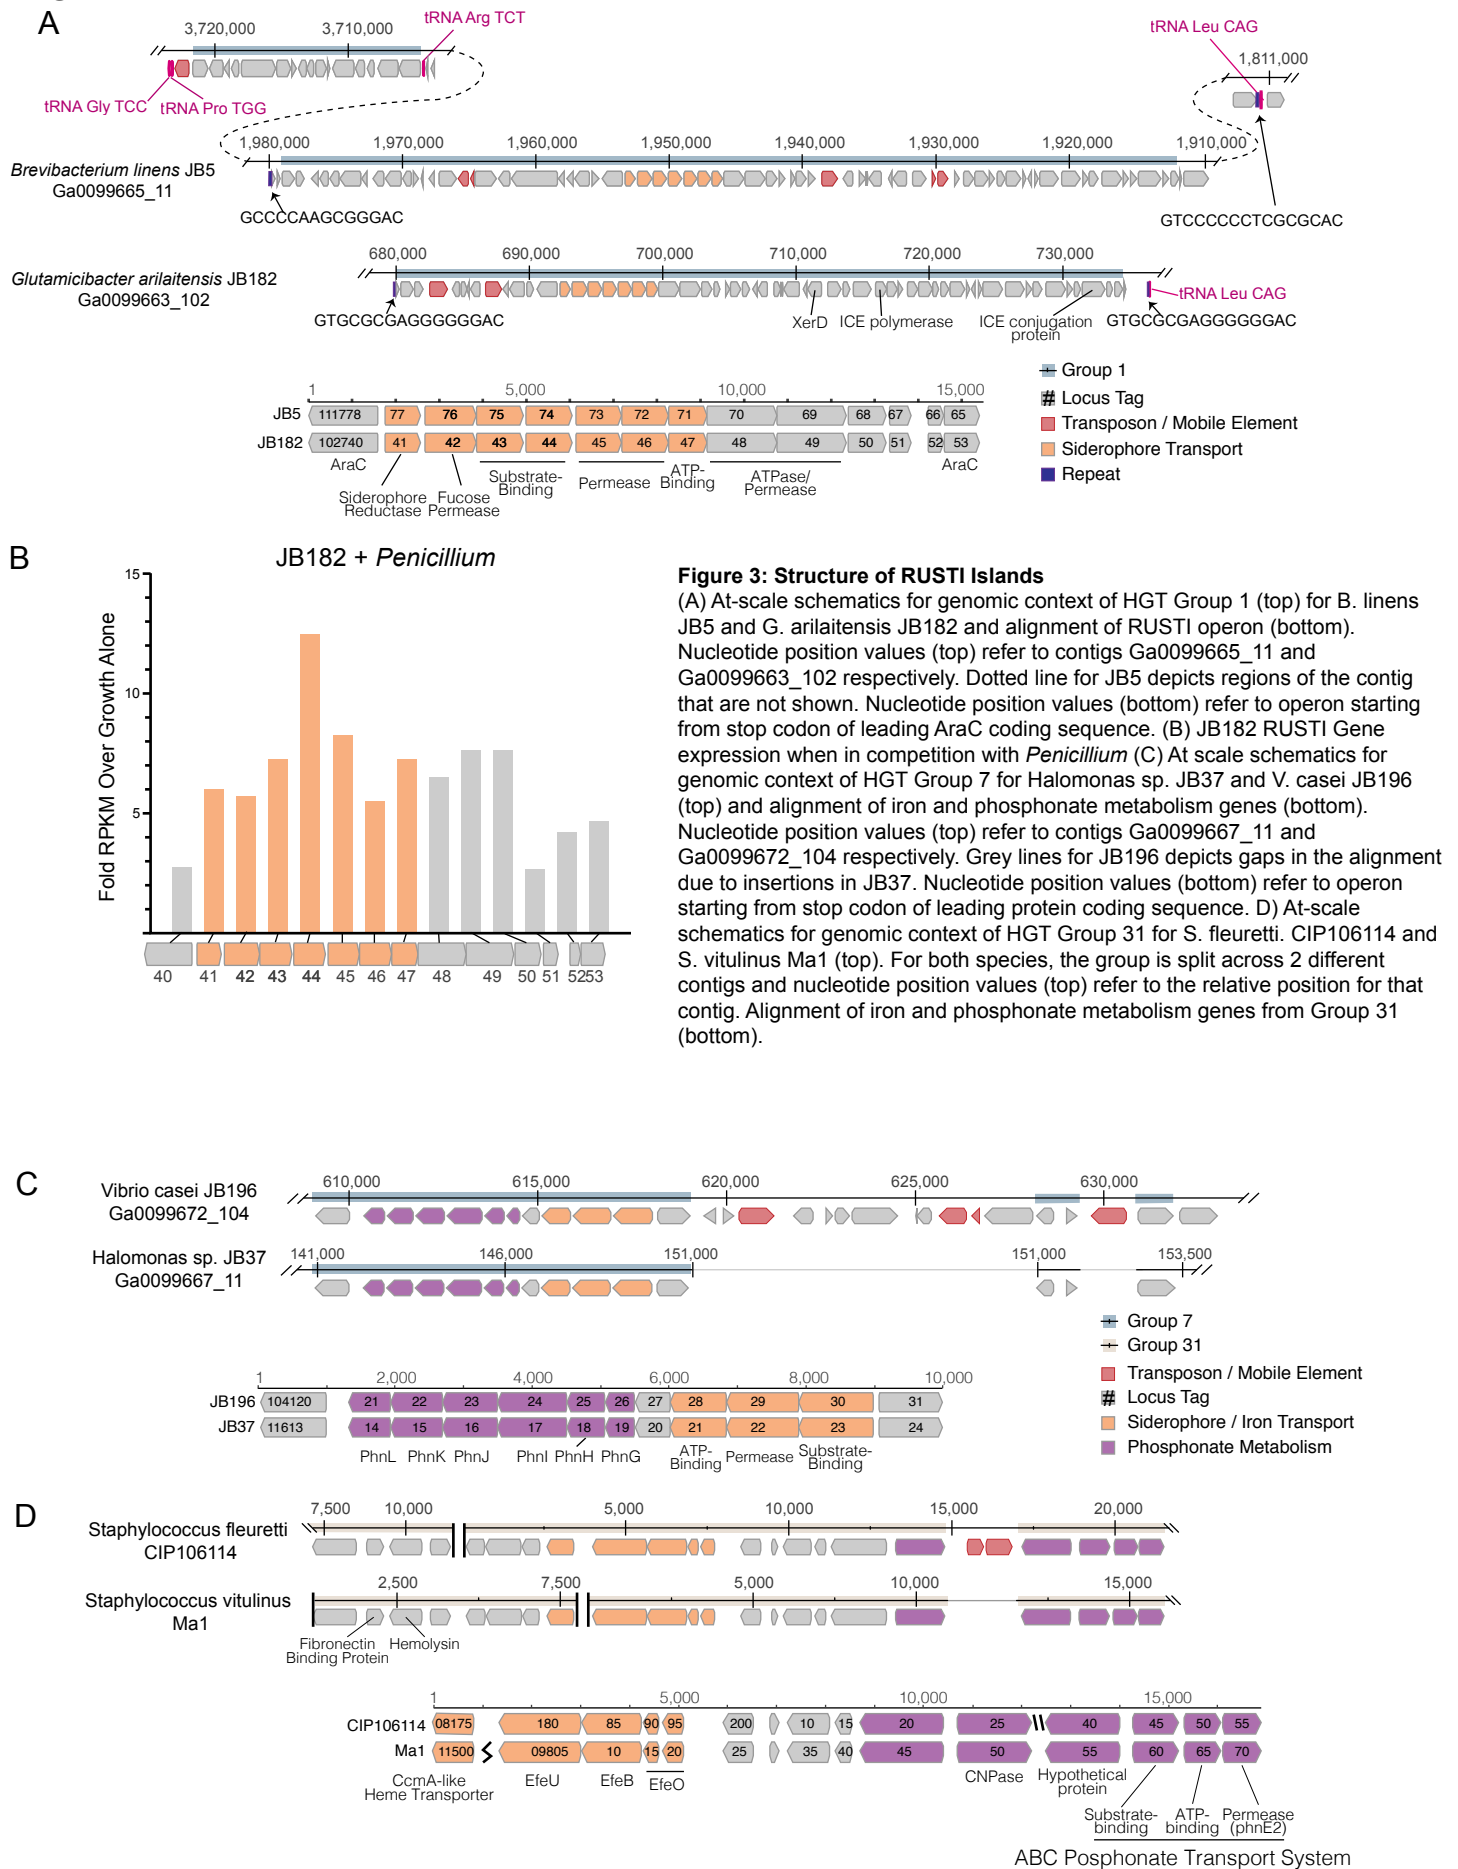

237 homology to hemin transporters in *Yersinia pestis* and *Bordetella pertussis* (Supplementary  
238 Table 7).

239 The same gene island also contains genes related to the Phn family involved in phosphonate  
240 import and metabolism [42]. Phosphonate metabolism genes have previously been associated  
241 with iron siderophore acquisition in acidic environments [43]), and cheese is typically close to  
242 pH5 during the initial periods of rind community growth. Interestingly, BLAST of this region  
243 against the NCBI RefSeq database reveals that several uropathogenic *E. coli* strains share  
244 identical DNA sequences (Supplementary Table 8). Highly similar sequences are found in  
245 *Oligella urethralis*, another gram negative pathogen of the urogenital tract, and *Vibrio harveyi*, a  
246 bioluminescent ocean-dwelling microbe. Iron sequestration by animals is a common defense  
247 against pathogens [44] and enhanced iron acquisition is commonly associated with virulence.  
248 Mammals produce lactoferrin in milk for the same reason [45], and these data suggest that the  
249 same genes would be adaptive in both pathogenesis and growth on cheese.

250 The convergence of strategies for both pathogenesis and growth on cheese is also  
251 demonstrated in the Firmicutes (Figure 3D). Two species of cheese-associated *Staphylococcus*  
252 (*S. fleuretti* CIP106114 and *S. vitulinus* Ma1) share a large (~20kb) cluster of genes (Group 31)  
253 that includes hemolysin and fibronectin binding protein (FnBP), which are involved in virulence  
254 in *S. aureus* [46,47]. Hemolysin (also known as alpha toxin) forms pores in cell membranes, and  
255 is so-named due to its ability to lyse red blood cells. FnBP enables binding to and invasion of  
256 cells, and has been implicated in the formation of biofilms in methicillin resistant *S. aureus* [48].  
257 It is unlikely that these genes provide a selective advantage to cheese-associated  
258 Staphylococci, but Group 31 also contains genes for iron acquisition. These genes are  
259 homologous to the EfeUOB systems in *E. coli* and *Bacillus subtilis* and FepABC system in *S.*  
260 *aureus*, which are active in low-pH conditions [49–51]. These iron acquisition genes are also  
261 found in association with hemolysin and FnBP in *S. aureus* and the animal-associated *S. sciuri*,  
262 though at only ~80% nucleotide identity (supplementary Table 8) [52]. Since iron acquisition  
263 genes may be adaptive both on cheese and in pathogenesis, it is possible that this region was  
264 acquired from an animal pathogen, and the virulence genes have been preserved due to their  
265 association with these genes.

266 The genomes sequenced are from a limited number of cheeses from Europe and the United  
267 States. In order to determine the distribution of RUSTI across a more expansive sampling of  
268 cheese microbiomes, we used BLAST searches against assembled metagenomic data from 38  
269 different cheeses using representative Proteo-, Actino-, and Staph-RUSTI sequences (Figure  
270 4). Gene islands at least 97% identical to ActinoRUSTI were readily identified in 23 (61%) of  
271 these metagenomes, in both natural and washed rind cheeses from the United States and  
272 Europe. Though less common (26% of metagenomes), ProteoRUSTI was also identified in  
273 diverse cheeses in both the US and Europe. StaphRUSTI could not be found in any of the  
274 metagenomes we analyzed. These data demonstrate that siderophore-associated HGT islands  
275 are widespread in cheese rind microbiomes. Whether independent HGT events are happening  
276 within each cheese production and aging facility, or if they happened before the widespread  
277 distribution of these microbes across cheese production regions is unknown.

## Figure 4

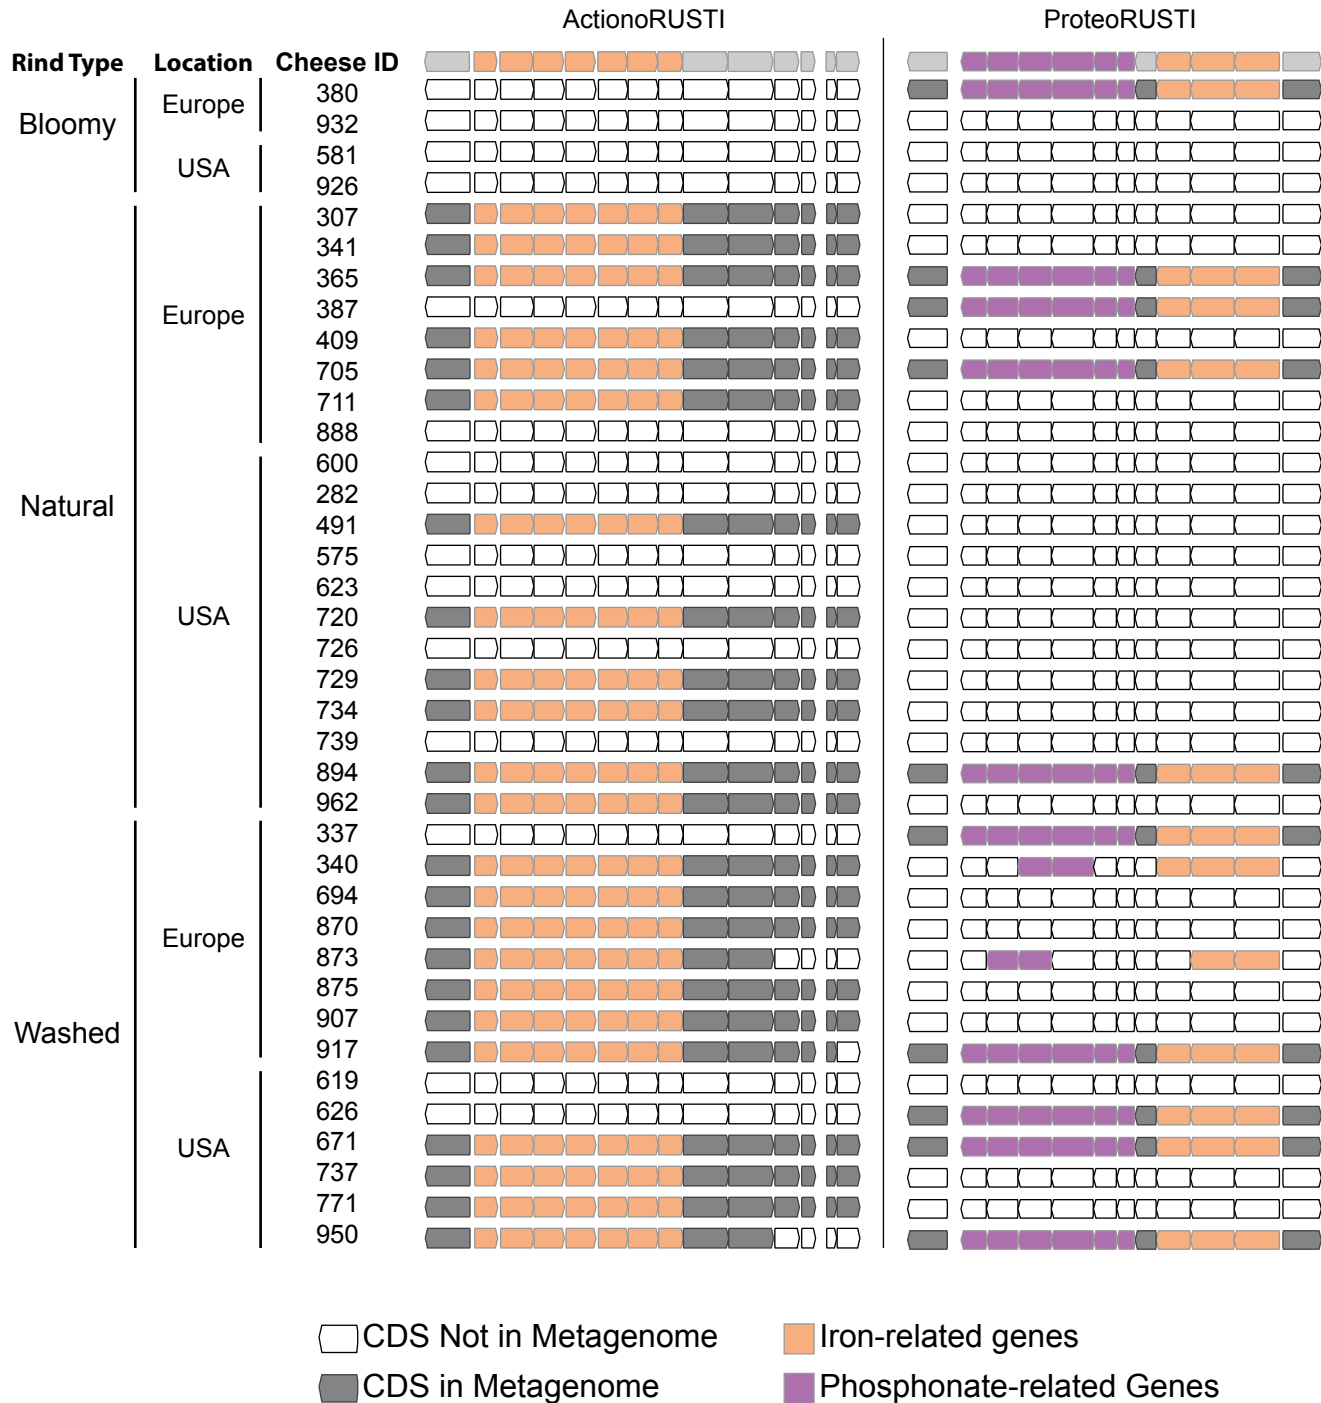

**Figure 4: Presence of RUSTI in Cheese Metagenomes**

Genes in ActinoRUSTI (*G. arilaitensis* JB182) and ProteoRUSTI (*V. casei* JB196) regions were compared to 32 assembled metagenomes from the US and Europe. Filled CDS represents positive (>97% identical nucleotides) hit in that metagenome.

## 278 A potential mechanism of transfer and source of the Actinobacterial RUSTI

279 To begin to understand potential mechanisms which could mediate HGT in cheese-associated  
280 bacteria, we analyzed the sequences surrounding the RUSTI region of *Glutamicibacter* JB182.  
281 Conjugative elements are a common way for HGT to occur [53]. Integrative and conjugative  
282 elements (ICEs) can in part be identified by the presence of signature proteins associated with  
283 core functions of integration into and excision from the host genome (recombinase), replication  
284 as an extrachromosomal element (polymerase), and conjugation from the host to recipient cell  
285 (conjugation) [54]. Analysis of the *Glutamicibacter* JB182 RUSTI region reveal homologs of  
286 each of these protein classes (Figure 3A). A recombinase of the site-specific tyrosine  
287 recombinase XerD family (Ga0099663\_102762) [55], a hexameric ATPase conjugation protein  
288 of the VirD4/TraG/TraD family (Ga0099663\_102784) [56], and a homolog of the bi-functional  
289 primase-polymerase DNA replication protein family (Ga0099663\_102766). Interestingly,  
290 Actinobacterial ICE systems typically utilize a conjugation apparatus belonging to the  
291 SpoIIIE/FtsK family, which allows transfer of double-stranded DNA [57,58]. However, the  
292 conjugation machinery here is more reminiscent of Gram-negative and Firmicute systems of  
293 single-stranded transfer [59].

294 ICE integration is site-specific, and frequently occurs at the 3' end of tRNA genes [54].  
295 Immediately downstream of the RUSTI region in *Glutamicibacter* is a Leucine tRNA. The 3' end  
296 of the tRNA forms an imperfect repeat with the region immediately upstream of the RUSTI  
297 region, which strongly suggests that the tRNA-Leu is used at the integration site (*att* site) for this  
298 ICE. In order to determine whether this ICE is still active, we performed PCR using primers  
299 within and flanking the putative integration site (Figure 5A). We were able to detect PCR  
300 products which suggest that at least a portion of the cells within the population have lost the  
301 RUSTI ICE from their chromosome, and it is present as an extrachromosomal circular form  
302 (Figure 5B). Sequencing of the PCR product (primers 1+6) that spans the predicted excision  
303 site matched the predicted remaining sequence, containing Repeat element B (Figure 5D).  
304 Sequencing of the PCR product (primers 2+5) that spans the predicted circularization site  
305 matched the predicted sequence, containing Repeat element A (Figure 5E).

306 There are several possible explanations for the widespread distribution of of nearly identical  
307 ActinoRUSTI. Initial transfer events may have occurred in a single location, on the surface of a  
308 cheese or in livestock, and subsequently been dispersed to many separate cheesemaking  
309 facilities. The continued mobility of the ICE in JB182 raises the alternate possibility that it may  
310 be continually introduced to many cheeses from a common source. Cheese producers often use  
311 commercially-available "starter" cultures that contain desirable species, including many  
312 Actinobacteria [60]. We tested 5 common starter cultures for the presence of ActinoRUSTI by  
313 PCR, and positively identified it in 1 of them (Figure 5C). This culture is known to contain 2  
314 species of Actinobacteria, *Brevibacterium linens* and *Glutamicibacter nicotinae*. In order to  
315 identify which species may be the RUSTI donor, we plated the starter culture and isolated 4  
316 distinct strains based on colony morphology. SSU sequencing revealed that two isolates were  
317 *Glutamicibacter* and two were *Brevibacterium*. One of the *Brevibacterium* isolates tested  
318 positive for ActinoRUSTI by PCR (Figure 5C). Though we have no evidence for direct  
319 transmission of ActinoRUSTI from this starter culture, and thus cannot definitively conclude that

## Figure 5

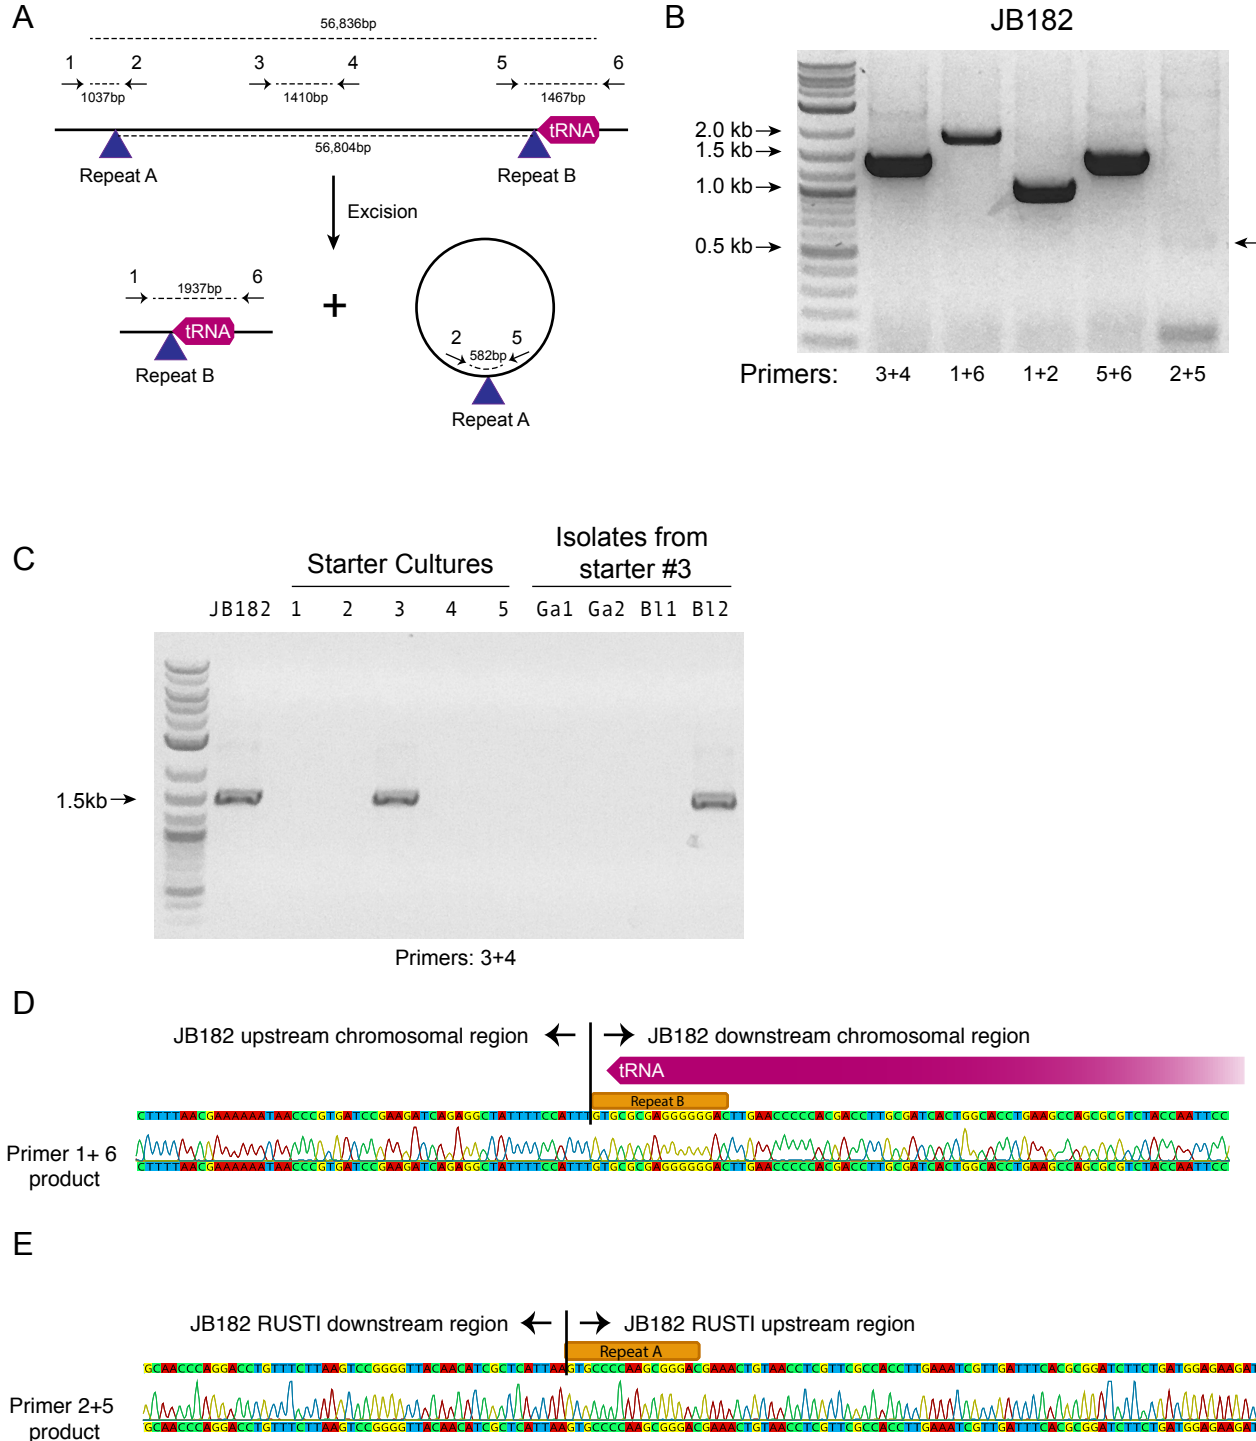

### Figure 5: Mobility of RUSTI

(A) Schematic for PCR primer design - see materials and methods for details. (B) PCR testing for the presence of RUSTI and for the excision of the ICE in an overnight culture of *G. arilaitensis* JB182. (C) DNA was extracted from 5 commercially available starter cultures and tested for the presence of RUSTI using PCR with primers specific for the HGT region (Materials and Methods). Starter culture 3 was plated on PCAMS media, and 4 isolates selected based on colony morphology were also tested. The expected size for the amplicon is ~1.4kb. Sequencing of the 16S ribosomal RNA genes for these isolates suggested that two isolates are *Glutamicibacter arilaitensis* and two are *Brevibacterium linens*. *G. arilaitensis* JB182 was used as a positive control. (D) The ~2000bp band from the PCR amplification using primers 1 and 6 and (E) the ~500bp band from amplification using primers 2 and 5) were extracted and sequenced. Alignment with the JB182 genome reveals 100% alignment with expected and the spliced chromosomal region containing the 3' repeat and the excision circle containing the 3' repeat respectively.

320 this was the source, these data are consistent with the hypothesis that HGT from a starter  
321 culture could explain some of the dissemination of ActinoRUSTI.

## 322 Discussion

323 In this paper, we provide evidence of extensive horizontal gene transfer in cheese-associated  
324 bacteria. Many of the transferred regions are large multi-gene islands, and are shared by  
325 numerous species. Genes involved in nutrient acquisition, especially iron and lactate, are  
326 particularly abundant, suggesting that HGT may provide a selective advantage in the iron and  
327 sugar limited environment of cheese. The largest HGT we identified appears to be an active ICE  
328 and is found in a starter culture, raising the possibility that we are observing contemporary  
329 processes that may have ongoing importance. These data support previous studies that show  
330 HGT is an important factor in the evolution of microbial communities [4] and suggest that  
331 cheese rind communities may be a useful model for studying this process in greater detail.

332 For this study, we focused on bacterial members of the cheese microbiome, but many cheeses  
333 also contain numerous fungal species. Indeed, HGT has been previously documented in  
334 cheese-associated *Penicillium* species [22]. HGT between bacteria and fungi has also been  
335 documented in other environments, though is thought to be rare [61]. Evaluating bacterial-fungal  
336 gene transfer in cheese could provide additional insights into the extent and importance of gene  
337 exchange in microbial communities. Further sequencing of bacterial genomes from cheese  
338 could also continue to reveal HGT.

339 We were able to show that ActinoRUSTI in *G. arilaitensis* JB182, is likely contained within an  
340 integrative and conjugative element, although many other mechanisms for transfer are likely at  
341 play. Indeed, the appearance of phage-related genes, transposases and other mobile elements  
342 in many HGT groups suggests that we are observing the results of multiple methods for  
343 mobilizing DNA.

344 Our method for identifying HGT does not permit us to determine the direction of gene flow, and  
345 indeed it seems likely that the original sources of many of these genetic elements are not  
346 present in our dataset. In some cases, we can infer a possible origin, such as the  
347 *Brevibacterium* strain in a starter culture that may be the source of RUSTI in multiple cheese  
348 species around the world. However, this does not enable us to identify where this species  
349 acquired them. Further characterization of cheese-associated microbes, as well as those found  
350 in dairy farms or in cheese caves may provide a more complete picture, but the evidence that at  
351 least some of these genetic elements are found in human pathogens and ocean dwelling  
352 bacteria suggests that genes are shared across diverse environments.

353 Though previous studies demonstrated that iron is limiting for *Glutamicibacter*, *Brevibacterium*,  
354 and *Corynebacterium* species growing on cheese [34,35], the preponderance of siderophore  
355 and other iron acquisition genes we observe being horizontally transferred suggests that the  
356 same is true across bacterial phyla. Limiting iron is a deliberate strategy on the part of  
357 mammalian hosts to block the growth of infectious microbes, and this strategy influences the  
358 composition of milk due to the presence of lactoferrin [45]. Interestingly, convergent strategies

359 for acquiring iron are utilized by pathogens and by cheese-associated microbes and we observe  
360 that in some cases these disparate species appear to have shared genes through horizontal  
361 transfer. The presence of these same genes in a microbe found in ocean habitats suggests that  
362 these genes have broad utility for the common challenge of iron limitation.

363 We have yet to demonstrate the functional consequences of these genes on individual species  
364 or on the community as a whole. Given that iron is limiting in cheese, and that ActinoRUSTI  
365 genes are upregulated in response to other species (Figure 4C), it is likely that these genes are  
366 functional and may play a role in competition. The prevalence of siderophore import, but not  
367 siderophore synthesis pathways may suggest that species may cheat by scavenging the  
368 biosynthetic products of others [62].

369 The identification of widespread sharing of genes in cheese microbial communities could have  
370 important implications. In particular, the possibility that a starter culture is the source of mobile  
371 gene elements suggests that the genomic content, rather than just specific species must be  
372 considered when designing microbial supplements. In addition to starter cultures used for  
373 fermented foods, living microbial supplements (“probiotics”) are increasingly being adopted in  
374 agriculture [63,64] and for a wide range of human health conditions [65–67] and even as  
375 cosmetics [68]. The need to screen for clinically relevant elements such as antibiotic resistance  
376 genes is widely recognized [69], but other mobile gene elements from these organisms may  
377 also enter native microbial populations with unknown consequences.

378 Though we and others observe a large number of HGT events in microbial species across a  
379 diverse range of environments ([Ravenhall et al. 2015](#); [Smillie et al. 2011](#); [McDaniel et al. 2010](#)),  
380 the biotic and abiotic conditions that affect this frequency, and what effects HGT may have on  
381 the community remain unclear. A model system to study HGT in a community context is  
382 particularly important, since sequence-based characterization of complex communities has  
383 particular limitations when it comes to HGT. Further, even if complete characterization *in situ*  
384 were possible, many microbial communities are difficult to experimentally manipulate *in vitro*.

385 By contrast, cheese rind-associated bacteria are readily isolated and cultured, and model  
386 communities may enable identification of features of microbial communities and their  
387 environments that alter frequency and extent of HGT. The cheese rind model system provides  
388 an opportunity to observe HGT as it happens and to investigate how community composition  
389 affects the frequency of transfer and the persistence of genes. The *in vitro* cheese system  
390 enables experimental manipulation to investigate the role of community composition in driving  
391 HGT. Further, since many gene products may only have survival benefits in the context of  
392 community competition and cooperation, investigating the role of RUSTI and other horizontally  
393 transferred genes on microbial growth in the context of their natural community is critical.  
394 Having an experimentally-tractable microbial community will allow us to test these ideas under  
395 controlled conditions in the laboratory and generate predictions about how these processes  
396 work in more complex natural systems. Many species of cheese-associated bacteria have close  
397 relatives in the soil, on skin, in the ocean, making insight from this system potentially applicable  
398 to diverse environments. In addition, horizontal acquisition of iron-uptake genes has been  
399 documented in numerous environments including the oceans and in human pathogens [70,71],

400 suggesting that the specific processes occurring in cheese may also be generally informative  
401 across systems. Understanding the extent of HGT in the cheese microbiome is the first step  
402 towards addressing how the movement of genes shapes and is shaped by a microbial  
403 community. Using cheese rinds as a model system can help elucidate the factors that influence  
404 the frequency of HGT, how it impacts competition and cooperation, and helps shape a  
405 microbiome.

## 406 Methods

### 407 Sequencing and Genome Assembly

408 Bacterial strains JB4, 5, 7, 37, 110, 182, 196, and 197 were isolated from cheeses in a single  
409 geographic region and sequenced using a combination of Illumina short-read (100bp, paired  
410 end) and Pacbio long-read sequencing. DNA was extracted using Genomic Tip 100/G (Qiagen,  
411 USA) or Power Soil (MoBio, USA). Illumina library preparation and sequencing were performed  
412 at Harvard University by the Bauer Core facility. Pacbio library preparation and sequencing were  
413 performed by the University of Massachusetts Medical School Deep Sequencing Core. De novo  
414 hybrid assembly was performed using SPAdes (v3.5.0) [72]. Genomes were annotated using  
415 the Integrated Microbial Genomes Expert Review (IMG/ER) annotation pipeline [73]. In addition,  
416 we also sequenced 8 additional rind isolates of *Brachybacterium* (strains 341.9, 738.10, 862.8,  
417 876.9, 900.8, 908.11, 947.1, 962.10) and *Brevibacterium* (strains 341.13, 738.8, 862.7, 876.7,  
418 900.6, 908.7, 947.7, 962.8) and 3 additional isolates of *Glutamicibacter* (strains BW77, 78, 80)  
419 from different cheeses in a broad geographic distribution. For these isolates, we prepared draft  
420 genomes using Illumina short-read sequencing and assembled with CLC genomics workbench.

421 The annotated genomes used can be found on Zenodo [74]

### 422 Phylogenetic trees

423 16S sequences were retrieved from the sequenced genomes and aligned using the structure-  
424 based aligner, Infernal v1.1rc4[75], as implemented in the Ribosomal Database Project release  
425 11 [76]. The alignment was imported into Geneious v9 (Biomatters, LTD), and a tree was  
426 calculated using the maximum likelihood method PHYML (GTR model)[77]. The tree was rooted  
427 using *Thermus thermophilus*. The tree was then uploaded to Interactive Tree of Life  
428 (iTOLv3)[78] to enable mapping of HGT data (connections and group abundance profiles).

### 429 RNAseq

430 Four replicate transcriptomes from two treatments were sequenced: 1) *G. arilaitensis* alone and  
431 2) *G. arilaitensis* + *Penicillium*. We used a strain of *Penicillium solitum* that was isolated from a  
432 natural rind cheese and was used for experiments in Wolfe et al. 2014. For each experimental  
433 unit, approximately 80,000 CFUs of *Glutimicibacter arilaitensis* were spread across the surface  
434 of a 100mm Petri dish containing 20 mL of cheese curd agar (10% freeze-dried fresh cheese,  
435 3% NaCl, 1.7% agar, 0.5% xanthan gum) [26]. For the + *Penicillium* treatment, approximately



436 100,000 CFUs were co-inoculated onto the plates with the *Glutimicibacter*. Plates were  
437 incubated in a bin with moist paper towel (> 90% relative humidity) at 24 °C for 5 days.

438  
439 Rind biofilms were then harvested by scraping the cheese curd surface and stored in  
440 RNAProtect Reagent (Qiagen) to stabilize mRNA frozen at -80°C. RNA was extracted using a  
441 standard phenol-chloroform protocol used for many different fungal and bacterial species and  
442 has been adopted from transcriptomics work in gut microbiomes, (see[79]). This protocol uses a  
443 standard bead-beating step in a lysis buffer to release cell contents from biofilms stored in  
444 RNAProtect. DNA was removed from the samples using a TURBO DNA-free kit (Life  
445 Technologies), and 5S, tRNA and large rRNA was depleted using MEGAClear (Life  
446 Technologies) and RiboZero (Illumina) kits, respectively. To remove both fungal and bacterial  
447 large rRNA, we used an equal mixture of Ribo-Zero Yeast and Bacteria rRNA Removal  
448 Solution. To confirm that the samples are free of DNA contaminants, a PCR of the 16S rRNA  
449 gene was with standard primers (27f and 1492r). Overall quantity and quality of the RNA preps  
450 were confirmed by Nanodrop and Agilent 2100 Bioanalyzer using the RNA 6000 Nano kit.

451  
452 RNA-seq libraries were constructed from purified mRNA using the NEBNext Ultra RNA Library  
453 Prep Kit for Illumina (New England Biolabs) where each library received a unique 6 base pair  
454 barcode for demultiplexing after the sequencing run. Each library was run on an Agilent 2100  
455 Bioanalyzer High Sensitivity DNA chip to confirm that primer dimers and adapter dimers are not  
456 present in the sample and to determine the size of the library. Final libraries were standardized  
457 to 10 nM each after quantification with a Qubit dsDNA HS Assay Kit (Life Technologies) and the  
458 pooled in equal amounts to get similar sequencing coverage across all libraries. The pooled  
459 library samples were be sequenced using paired-end 100bp reads on an Illumina HiSeq Rapid  
460 Run by the Harvard Bauer Core Sequencing Core Facility.

461  
462 To quantify gene expression and determine if genes within RUSTI were differentially expressed  
463 when grown with the competitor *Penicillium*, we used Rockhopper [80]. Only forward reads were  
464 used for this analysis. The assembled and annotated *Glutamicibacter arilaitensis* strain JB182  
465 (described above) genome were used as a reference genome for mapping. We considered  
466 genes that had a greater than 4-fold difference in expression when grown with *Penicillium* or  
467 *Staphylococcus* and were significantly different (based on Rockhopper's *q*-values, which control  
468 for false discovery rate using the Benjamini-Hochberg procedure) to be differentially expressed  
469 genes.

## 470 PCR

471 PCR reactions were performed using Q5 Hot Start Mastermix (New England Biolabs). Where  
472 JB182 RUSTI is integrated in the chromosome, PCR using primer 1  
473 (CAACTGTGCCACGCAATTCA) and primer 2 (CGGCTACTTCTCGGATGGTC) are expected to  
474 produce a 1037bp product that includes the 5' ICE repeat. Primer 3  
475 (CGCAATCGTGGTGTATCTGC) and primer 4 (GACGGGATCAGGAACGACG) should produce  
476 a 1410bp product, while primer 5 (GCCGCATCTACCTCGATGAA), and primer 6  
477 (CCAAATCGCGACGCATTGAT) are expected to form a 1467bp product. Primers 1 and 6 are

478 separated by approximately 59kb when RUSTI is present and are not expected to form a PCR  
479 product, but should form a 1937bp product if RUSTI is excised. Primers 2 and 5 should not form  
480 a PCR product when RUSTI is integrated, but would form a 500bp product if the excision circle  
481 is present.

## 482 Additional Software

483 Annotated genomes were compared using blastn from BLAST+ (v2.3.0) [81]. Protein coding  
484 genes were considered potential HGT if their sequence was at least 99% identical for at least  
485 500 nucleotides. Neighboring candidate HGT were identified as part of the same island if they  
486 were separated by no more than 5000 nucleotides. Scripts to import and store genome  
487 information and blast results and to analyze results are available on github [82].

488 Genomic average nucleotide identity (ANI) was calculated using the “ani.rb” script from the  
489 enveomics collection (commit “e8faed01ff848222afb5820595cccc4e50c89992”) with default  
490 settings [31].

## 491 Metagenomes

492 Shotgun metagenomic data from [26] and [27] were assembled with CLC Genomic Workbench  
493 8.0. Representative sequences for ActinoRUSTI or ProteoRUSTI were compared to assembled  
494 metagenomes by BLAST. Hits with >97% similarity were considered positive hits for target  
495 regions.

## 496 Accession Numbers

497 Newly sequenced genomes were registered with NCBI with the bioproject ID PRJNA387187.  
498 Biosample accession numbers for individual genomes are shown in Supplementary Table 1,  
499 and are as follows:

500 *Brevibacterium linens* 341\_13: SAMN07141149, *Brevibacterium linens* 738\_8: SAMN07141150,  
501 *Brevibacterium linens* 862\_7: SAMN07141151, *Brevibacterium linens* 876\_7: SAMN07141152,  
502 *Brevibacterium linens* 900\_6: SAMN07141153, *Brevibacterium linens* 908\_7: SAMN07141154,  
503 *Brevibacterium linens* 947\_7: SAMN07141155, *Brevibacterium linens* 962\_8: SAMN07141156,  
504 *Brachybacterium alimentarium* 341\_9: SAMN07141157, *Brachybacterium alimentarium* 738\_10:  
505 SAMN07141158, *Brachybacterium alimentarium* 862\_8: SAMN07141159, *Brachybacterium*  
506 *alimentarium* 876\_9: SAMN07141160, *Brachybacterium alimentarium* 900\_8: SAMN07141161,  
507 *Brachybacterium alimentarium* 908\_11: SAMN07141162, *Brachybacterium alimentarium*  
508 947\_11: SAMN07141163, *Brachybacterium alimentarium* 962\_10: SAMN07141164,  
509 *Glutamicibacter* sp. BW77: SAMN07141165, *Glutamicibacter* sp. BW78: SAMN07141166,  
510 *Glutamicibacter* sp. BW80: SAMN07141167, *Microbacterium* sp. JB110: SAMN07141168,  
511 *Halomonas* sp. JB37: SAMN07141169, *Brevibacterium linens* JB5: SAMN07141170,  
512 *Psychrobacter* sp. JB193: SAMN07141171, *Brachybacterium* sp. JB7: SAMN07141172,  
513 *Sphingobacterium* sp. JB170: SAMN07141173, *Vibrio casei* JB196: SAMN07141174,

514 *Arthrobacter* sp. JB182: SAMN071411175, *Corynebacterium* sp. JB4: SAMN071411176,  
515 *Pseudoalteromonas* sp. JB197: SAMN071411177.

## 516 Acknowledgements

517 The authors would like to thank Rajashree Mishra for assisting with initial stages of project  
518 development, Dana Boyd for assistance with ICE identification, Brian Tsu for assistance with the  
519 Transporter Classification Database, and members of the Dutton lab for helpful conversations.

## 520 Conflicts of Interest

521 The authors declare that they have no competing interests.

## 522 Funding

523 KSB, BEW, and RJD received support from NIH grant P50 GM068763 to Harvard University.

## 524 Figures

### 525 Figure 1: Extensive Horizontal Gene Transfer in the Cheese Microbiome

526 (A) All HGT events in analyzed cheese-associated bacteria. Connection thickness is scaled to #  
527 of shared protein coding sequences. Maximum likelihood tree based on 16S RNA alignment  
528 using Ribosomal Database Project (RDP). (B) HGT events clustered into 264 “groups” based on  
529 genomic proximity. Groups are plotted based on total nucleotide content (x-axis, from low to  
530 high), and the mean number of genes per species (y-axis). Diameter of each circle is  
531 proportional to the total number of species in the group. Groups highlighted in red are described  
532 further in the text. (C) Quantification of KEGG modules and submodules for protein coding  
533 genes (CDS) identified as horizontally transferred. Annotations were generated by BLAST-  
534 Koala. Genes without function prediction are not depicted.

### 535 Figure 2: HGT Groups in Actinobacteria, Firmicutes, and $\gamma$ -Proteobacteria 536 Groups

537 (A) The 31 largest HGT groups that contain predominantly Actinobacteria. The areas of colored  
538 circles are scaled to  $\log_2(n)$ , where  $n$  is the total number of nucleotides in that group for each  
539 species. The largest circle size represents the largest HGT group in that phylum. Protein  
540 function matrix (top) is shaded if at least one protein coding sequence in the group has that  
541 function. Phylogenies (left) are based on small subunit ribosomal RNA alignment. (B) The 25  
542 largest HGT groups that contain predominantly Firmicutes. (C) The 28 Largest groups that  
543 contain predominantly  $\gamma$ -Proteobacteria.

## 544 Figure 3: Structure of RUSTI Islands

545 (A) At-scale schematics for genomic context of HGT Group 1 (top) for *B. linens* JB5 and *G.*  
546 *arilaitensis* JB182 and alignment of RUSTI operon (bottom). Nucleotide position values (top)  
547 refer to contigs Ga0099665\_11 and Ga0099663\_102 respectively. Dotted line for JB5 depicts  
548 regions of the contig that are not shown. Nucleotide position values (bottom) refer to operon  
549 starting from stop codon of leading AraC coding sequence. (B) At scale schematics for genomic  
550 context of HGT Group 7 for *Halomonas* sp. JB37 and *V. casei* JB196 (top) and alignment of iron  
551 and phosphonate metabolism genes (bottom). Nucleotide position values (top) refer to contigs  
552 Ga0099667\_11 and Ga0099672\_104 respectively. Grey lines for JB196 depicts gaps in the  
553 alignment due to insertions in JB37. Nucleotide position values (bottom) refer to operon starting  
554 from stop codon of leading protein coding sequence. (C) At-scale schematics for genomic  
555 context of HGT Group 31 for *S. fleuretti*. CIP106114 and *S. vitulinus* Ma1 (top). For both  
556 species, the group is split across 2 different contigs and nucleotide position values (top) refer to  
557 the relative position for that contig. Alignment of iron and phosphonate metabolism genes from  
558 Group 31 (bottom).

## 559 Figure 4: Presence of RUSTI in Cheese Metagenomes

560 Genes in ActinoRUSTI (*G. arilaitensis* JB182) and ProteoRUSTI (*V. casei* JB196) regions were  
561 compared to 32 assembled metagenomes from the US and Europe. Filled CDS represents  
562 positive (>97% identical nucleotides) hit in that metagenome.

## 563 Figure 5: Mobility of RUSTI

564 (A) Schematic for PCR primer design - see materials and methods for details. (B) PCR testing  
565 for the presence of RUSTI and for the excision of the ICE in an overnight culture of *G.*  
566 *arilaitensis* JB182. (C) DNA was extracted from 5 commercially available starter cultures and  
567 tested for the presence of RUSTI using PCR with primers specific for the HGT region (Materials  
568 and Methods). Starter culture 3 was plated on PCAMS media, and 4 isolates selected based on  
569 colony morphology were also tested. The expected size for the amplicon is ~1.4kb. Sequencing  
570 of the 16S ribosomal RNA genes for these isolates suggested that two isolates are  
571 *Glutamicibacter arilaitensis* and two are *Brevibacterium linens*. *G. arilaitensis*. JB182 was used  
572 as a positive control. (D) The ~2000bp band from the PCR amplification using primers 1 and 6  
573 and (E) the ~500bp band from amplification using primers 2 and 5 were extracted and  
574 sequenced. Alignment with the JB182 genome reveals 100% alignment with expected and the  
575 spliced chromosomal region containing the 3' repeat and the excision circle containing the 3'  
576 repeat respectively.

## 577 Figure 1: figure supplement 1

578 Schematic of software pipeline to identify HGT. (1) Sequenced genomes are annotated with  
579 IMG/ER and downloaded in Genbank format. (2) All annotated genes in all genomes are used  
580 to assemble a BLAST database using BLAST+ command-line tools. (3) All protein-coding genes  
581 (CDS) from all species are queried against the BLAST database. Hits from the same species  
582 are discarded; hits from species with an ANI >89% were discarded; other hits are saved. (4) For

583 each species, coding sequences that have at least one BLAST hit are grouped into islands  
584 based on proximity. Genes that are within 5kb of each other on the same contig are considered  
585 part of the same island. (5) Islands in each species are compared to islands in each other  
586 species to form groups. Islands that share at least 1 gene in common according to BLAST  
587 parameters in step 3 are placed in the same group.

## 588 Figure 1: figure supplement 2

589 Same as Figure 1A with branch labels. All HGT events in analyzed cheese-associated bacteria.  
590 Connection thickness is scaled to # of shared protein coding sequences. Phylogenetic tree  
591 based on 16S RNA alignment using Ribosomal Database Project (RDP).

## 592 Figure 2: figure supplement 1

593 Group A: Expected clustering: contiguous genes in multiple species are in a single group.  
594 Though island 6 (i6) lacks one gene present in i1 and i4, (possibly because of a transposon  
595 insertion), it is still considered related. Group B: Ambiguous grouping: Islands 2 and 3 from  
596 species 1 are found on different contigs, but are grouped together. They may be found in close  
597 proximity in the genome, but on different sides of a gap in the assembly, or they may be quite  
598 distant from each other. The grouping of related genes in species 2 into a single island suggests  
599 that they may have been transferred in a single event, but the possibility of two unrelated HGT  
600 events landing in the same spot cannot be excluded. Group C: Possible mis-grouping of two  
601 HGT events in a single group: Though species 4 does not share any genes with species 1 and  
602 2, these islands are nevertheless clustered due to the proximity of coding sequences in species  
603 3. This may correctly represent a single gene cluster that subsequently diverged in each  
604 species, or unrelated HGT that happened to insert in close proximity. Group D: Mis-grouping  
605 due to mobile element: Mobile elements (outlined in red) found in multiple locations in multiple  
606 genomes may insert next to unrelated HGT islands, causing spurious grouping by the algorithm.

## 607 Supplementary Table 1: Genome Information

608 Genome statistics for newly sequenced genomes, determined by IMG/ER. Gene IDs refer to  
609 IMG bioproject or RefSeq Accession. Genomes from Almeida et. al. do not yet have Accession  
610 numbers.

## 611 Supplementary Table 2: Pairwise Species Comparison Summary

612 Total protein coding sequences (column "Shared CDS") and nucleotides (in base-pairs - column  
613 "Shared nt") determined to be horizontally transferred for every pair of species that were  
614 compared by the HGT detection pipeline. Also shows calculated ANI and 16S similarity in %  
615 (column ssu - see materials and methods for method of determining 16S similarity). Species  
616 pairs that have ANI > 0.89 were not compared and are not shown.

### 617 Supplementary Table 3: HGT Identification Parameters

618 Different parameters for minimum length of gene match for HGT, maximum % ANI identity for  
619 related species, and maximum distance between genes in an island were compared. Number of  
620 positive HGT hits identified when varying the minimum protein coding gene length. Number of  
621 HGT groups constructed when varying the maximum separation between hits that are classified  
622 as belonging to the same group. Number of nucleotides or number of protein coding sequences  
623 in HGT regions by 16S similarity. Note - since 500bp is the minimum length for protein coding  
624 sequences in this analysis.

### 625 Supplementary Table 4: Full Group Annotations

626 All protein coding sequences identified as HGT, sorted by group # (ranked by total nucleotide  
627 content), species and genome location within species. Certain functional annotations are  
628 identified by color (eg orange for iron) based on text in annotation. Locus tags and contig IDs  
629 beginning with lowercase letters were assigned by kvasir, and do not correspond to any  
630 published database.

### 631 Supplementary Table 5: Group Summary Statistics

632 Summary statistics for each HGT group.

### 633 Supplementary Table 6: Highly Conserved Genes in *Brevibacterium* 634 species

635 Protein coding sequences from Group 29, as well as selected highly conserved genes from  
636 *Brevibacterium antiquum* CNRZ918 were compared to other *Brevibacterium* strains by BLAST.  
637 *B. linens* 947.7 has substantially lower nucleotide identity for the 4 genes found in Group 29  
638 than other *B. linens* strains, despite similar nt distance for other highly conserved genes. This  
639 suggests Group 29 is a true example of HGT between CNRZ918 and other *B. linens* strains,  
640 rather than a false-positive.

### 641 Supplementary Table 7: RUSTI Gene Expression During Competition

642 Gene expression data from RNA seq analysis for genes in JB182 RUSTI. Related to Figure 3C

### 643 Supplementary Table 8: TCBD Hits for Transporters in RUSTI

644 Representative CDS of Actino- and ProteoRUSTI from *G. arilaitensis* JB182 and *V. casei* JB196  
645 respectively were compared to the Transporter Classification Database (TCDB). Results colored  
646 according to type of siderophore transported according to annotation.

## 647 Supplementary Table 9: RefSeq BLAST

648 Actino- and ProteoRUSTI from *G. arilaitensis* JB182 and *V. casei* JB196 respectively, as well as  
649 the consensus sequence for StaphRUSTI (see figures 3 and 4) were compared to the NCBI  
650 RefSeq database using BLAST.

651

## 652 References

- 653 1. Widder S, Allen RJ, Pfeiffer T, Curtis TP, Wiuf C, Sloan WT, et al. Challenges in microbial  
654 ecology: building predictive understanding of community function and dynamics. ISME J.  
655 2016; doi:10.1038/ismej.2016.45
- 656 2. Nemergut DR, Schmidt SK, Fukami T, O'Neill SP, Bilinski TM, Stanish LF, et al. Patterns  
657 and processes of microbial community assembly. Microbiol Mol Biol Rev. 2013;77: 342–  
658 356.
- 659 3. Ochman H, Lawrence JG, Groisman EA. Lateral gene transfer and the nature of bacterial  
660 innovation. Nature. nature.com; 2000;405: 299–304.
- 661 4. Wiedenbeck J, Cohan FM. Origins of bacterial diversity through horizontal genetic transfer  
662 and adaptation to new ecological niches. FEMS Microbiol Rev. 2011;35: 957–976.
- 663 5. Tasse L, Bercovici J, Pizzut-Serin S, Robe P, Tap J, Klopp C, et al. Functional  
664 metagenomics to mine the human gut microbiome for dietary fiber catabolic enzymes.  
665 Genome Res. 2010;20: 1605–1612.
- 666 6. Hehemann J-H, Correc G, Barbeyron T, Helbert W, Czjzek M, Michel G. Transfer of  
667 carbohydrate-active enzymes from marine bacteria to Japanese gut microbiota. Nature.  
668 2010;464: 908–912.
- 669 7. Niehus R, Mitri S, Fletcher AG, Foster KR. Migration and horizontal gene transfer divide  
670 microbial genomes into multiple niches. Nat Commun. 2015;6: 8924.
- 671 8. McDaniel LD, Young E, Delaney J, Ruhnau F, Ritchie KB, Paul JH. High frequency of  
672 horizontal gene transfer in the oceans. Science. 2010;330: 50.
- 673 9. Andam CP, Carver SM, Berthrong ST. Horizontal Gene Flow in Managed Ecosystems.  
674 Annu Rev Ecol Evol Syst. 2015;46: 121–143.
- 675 10. Smillie CS, Smith MB, Friedman J, Cordero OX, David LA, Alm EJ. Ecology drives a global  
676 network of gene exchange connecting the human microbiome. Nature. 2011;480: 241–244.
- 677 11. McCarthy AJ, Loeffler A, Witney AA, Gould KA, Lloyd DH, Lindsay JA. Extensive horizontal  
678 gene transfer during *Staphylococcus aureus* co-colonization in vivo. Genome Biol Evol.  
679 2014;6: 2697–2708.
- 680 12. Hiramatsu K, Cui L, Kuroda M, Ito T. The emergence and evolution of methicillin-resistant  
681 *Staphylococcus aureus*. Trends Microbiol. 2001;9: 486–493.
- 682 13. Forsberg KJ, Reyes A, Wang B, Selleck EM, Sommer MOA, Dantas G. The shared

- 683 antibiotic resistome of soil bacteria and human pathogens. *Science*.  
684 [science.sciencemag.org](http://science.sciencemag.org); 2012;337: 1107–1111.
- 685 14. Rossi F, Rizzotti L, Felis GE, Torriani S. Horizontal gene transfer among microorganisms in  
686 food: current knowledge and future perspectives. *Food Microbiol*. 2014;42: 232–243.
- 687 15. Wang HH, Manuzon M, Lehman M, Wan K, Luo H, Wittum TE, et al. Food commensal  
688 microbes as a potentially important avenue in transmitting antibiotic resistance genes.  
689 *FEMS Microbiol Lett*. [femsle.oxfordjournals.org](http://femsle.oxfordjournals.org); 2006;254: 226–231.
- 690 16. Mathur S, Singh R. Antibiotic resistance in food lactic acid bacteria—a review. *Int J Food*  
691 *Microbiol*. Elsevier; 2005;105: 281–295.
- 692 17. Cocconcelli PS, Cattivelli D, Gazzola S. Gene transfer of vancomycin and tetracycline  
693 resistances among *Enterococcus faecalis* during cheese and sausage fermentations. *Int J*  
694 *Food Microbiol*. Elsevier; 2003;88: 315–323.
- 695 18. Delorme C. Safety assessment of dairy microorganisms: *Streptococcus thermophilus*. *Int J*  
696 *Food Microbiol*. Elsevier; 2008;126: 274–277.
- 697 19. Flórez AB, Delgado S, Mayo B. Antimicrobial susceptibility of lactic acid bacteria isolated  
698 from a cheese environment. *Can J Microbiol*. NRC Research Press; 2005;51: 51–58.
- 699 20. Li X, Xing J, Li B, Yu F, Lan X, Liu J. Phylogenetic analysis reveals the coexistence of  
700 interfamily and interspecies horizontal gene transfer in *Streptococcus thermophilus* strains  
701 isolated from the same yoghurt. *Mol Phylogenet Evol*. 2013;69: 286–292.
- 702 21. Liu M, Siezen RJ, Nauta A. In silico prediction of horizontal gene transfer events in  
703 *Lactobacillus bulgaricus* and *Streptococcus thermophilus* reveals protooperation in  
704 yogurt manufacturing. *Appl Environ Microbiol*. Am Soc Microbiol; 2009;75: 4120–4129.
- 705 22. Cheeseman K, Ropars J, Renault P, Dupont J, Gouzy J, Branca A, et al. Multiple recent  
706 horizontal transfers of a large genomic region in cheese making fungi. *Nat Commun*.  
707 2014;5: 2876.
- 708 23. Ropars J, Rodríguez de la Vega RC, López-Villavicencio M, Gouzy J, Sallet E, Dumas É, et  
709 al. Adaptive Horizontal Gene Transfers between Multiple Cheese-Associated Fungi. *Curr*  
710 *Biol*. 2015;25: 2562–2569.
- 711 24. Gibbons JG, Rinker DC. The genomics of microbial domestication in the fermented food  
712 environment. *Curr Opin Genet Dev*. 2015;35: 1–8.
- 713 25. Button JE, Dutton RJ. Cheese microbes. *Curr Biol*. 2012;22: R587–9.
- 714 26. Wolfe BE, Button JE, Santarelli M, Dutton RJ. Cheese rind communities provide tractable  
715 systems for in situ and in vitro studies of microbial diversity. *Cell*. 2014;158: 422–433.
- 716 27. Kastman EK, Kamelamela N, Norville JW, Cosetta CM, Dutton RJ, Wolfe BE. Biotic  
717 interactions shape the ecological distributions of *Staphylococcus* species. *MBio*. 2016;  
718 doi:10.1128/mBio.01157-16
- 719 28. Monnet C, Landaud S, Bonnarme P, Swennen D. Growth and adaptation of  
720 microorganisms on the cheese surface. *FEMS Microbiol Lett*. 2015;362: 1–9.



- 721 29. Almeida M, Hébert A, Abraham A-L, Rasmussen S, Monnet C, Pons N, et al. Construction  
722 of a dairy microbial genome catalog opens new perspectives for the metagenomic analysis  
723 of dairy fermented products. *BMC Genomics*. 2014;15: 1101.
- 724 30. Chan JZ-M, Halachev MR, Loman NJ, Constantinidou C, Pallen MJ. Defining bacterial  
725 species in the genomic era: insights from the genus *Acinetobacter*. *BMC Microbiol*.  
726 2012;12: 302.
- 727 31. Rodriguez-R LM, Konstantinidis KT. The enveomics collection: a toolbox for specialized  
728 analyses of microbial genomes and metagenomes [Internet]. *PeerJ Preprints*; 2016 Mar.  
729 Report No.: e1900v1. doi:10.7287/peerj.preprints.1900v1
- 730 32. Ravenhall M, Škunca N, Lassalle F, Dessimoz C. Inferring horizontal gene transfer. *PLoS*  
731 *Comput Biol*. [journals.plos.org](http://journals.plos.org); 2015;11: e1004095.
- 732 33. Kanehisa M, Sato Y, Morishima K. BlastKOALA and GhostKOALA: KEGG Tools for  
733 Functional Characterization of Genome and Metagenome Sequences. *J Mol Biol*.  
734 2016;428: 726–731.
- 735 34. Monnet C, Back A, Irlinger F. Growth of aerobic ripening bacteria at the cheese surface is  
736 limited by the availability of iron. *Appl Environ Microbiol*. 2012;78: 3185–3192.
- 737 35. Monnet C, Loux V, Gibrat J-F, Spinnler E, Barbe V, Vacherie B, et al. The arthrobacter  
738 *arilaitensis* Re117 genome sequence reveals its genetic adaptation to the surface of  
739 cheese. *PLoS One*. 2010;5: e15489.
- 740 36. Walter F, Albersmeier A, Kalinowski J, Rückert C. Complete genome sequence of  
741 *Corynebacterium casei* LMG S-19264T (=DSM 44701T), isolated from a smear-ripened  
742 cheese. *J Biotechnol*. 2014;189: 76–77.
- 743 37. Hider RC, Kong X. Chemistry and biology of siderophores. *Nat Prod Rep*. 2010;27: 637.
- 744 38. Saier MH Jr, Reddy VS, Tsu BV, Ahmed MS, Li C, Moreno-Hagelsieb G. The Transporter  
745 Classification Database (TCDB): recent advances. *Nucleic Acids Res*. 2016;44: D372–9.
- 746 39. Elkins MF, Earhart CF. Nucleotide sequence and regulation of the *Escherichia coli* gene for  
747 ferrienterobactin transport protein FepB. *J Bacteriol*. 1989;171: 5443–5451.
- 748 40. Shea CM, McIntosh MA. Nucleotide sequence and genetic organization of the ferric  
749 enterobactin transport system: homology to other periplasmic binding protein-dependent  
750 systems in *Escherichia coli*. *Mol Microbiol*. 1991;5: 1415–1428.
- 751 41. Chenault SS, Earhart CF. Organization of genes encoding membrane proteins of the  
752 *Escherichia coli* ferrienterobactin permease. *Mol Microbiol*. 1991;5: 1405–1413.
- 753 42. Jochimsen B, Lolle S, McSorley FR, Nabi M, Stougaard J, Zechel DL, et al. Five  
754 phosphonate operon gene products as components of a multi-subunit complex of the  
755 carbon-phosphorus lyase pathway. *Proc Natl Acad Sci U S A*. 2011;108: 11393–11398.
- 756 43. Osorio H, Martínez V, Nieto PA, Holmes DS, Quatrini R. Microbial iron management  
757 mechanisms in extremely acidic environments: comparative genomics evidence for  
758 diversity and versatility. *BMC Microbiol*. 2008;8: 203.

- 759 44. Parrow NL, Fleming RE, Minnick MF. Sequestration and scavenging of iron in infection.  
760 Infect Immun. 2013;81: 3503–3514.
- 761 45. Ellison RT 3rd. The effects of lactoferrin on gram-negative bacteria. Adv Exp Med Biol.  
762 1994;357: 71–90.
- 763 46. Sinha B, François PP, Nüsse O, Foti M. Fibronectin- binding protein acts as Staphylococcus  
764 aureus invasin via fibronectin bridging to integrin  $\alpha 5\beta 1$ . Cellular. Wiley Online Library; 1999;  
765 Available: <http://onlinelibrary.wiley.com/doi/10.1046/j.1462-5822.1999.00011.x/full>
- 766 47. Cheung AL, Ying P. Regulation of alpha- and beta-hemolysins by the sar locus of  
767 Staphylococcus aureus. J Bacteriol. Am Soc Microbiol; 1994;176: 580–585.
- 768 48. McCourt J, O'Halloran DP, McCarthy H, O'Gara JP, Geoghegan JA. Fibronectin-binding  
769 proteins are required for biofilm formation by community-associated methicillin-resistant  
770 Staphylococcus aureus strain LAC. FEMS Microbiol Lett. 2014;353: 157–164.
- 771 49. Cao J, Woodhall MR, Alvarez J, Cartron ML, Andrews SC. EfeUOB (YcdNOB) is a  
772 tripartite, acid-induced and CpxAR-regulated, low-pH Fe<sup>2+</sup> transporter that is cryptic in  
773 Escherichia coli K-12 but functional in E. coli O157: H7. Mol Microbiol. Wiley Online Library;  
774 2007;65: 857–875.
- 775 50. Miethke M, Monteferrante CG, Marahiel MA, van Dijl JM. The Bacillus subtilis EfeUOB  
776 transporter is essential for high-affinity acquisition of ferrous and ferric iron. Biochim  
777 Biophys Acta. 2013;1833: 2267–2278.
- 778 51. Turlin E, Débarbouillé M, Augustyniak K, Gilles A-M, Wandersman C. Staphylococcus  
779 aureus FepA and FepB proteins drive heme iron utilization in Escherichia coli. PLoS One.  
780 2013;8: e56529.
- 781 52. Kloos WE, Schleifer KH. Characterization of Staphylococcus sciuri sp. nov. and Its  
782 Subspecies 1. of Systematic and ... ijs.microbiologyresearch.org; 1976; Available:  
783 <http://ijs.microbiologyresearch.org/content/journal/ijsem/10.1099/00207713-26-1-22>
- 784 53. Wozniak RAF, Waldor MK. Integrative and conjugative elements: mosaic mobile genetic  
785 elements enabling dynamic lateral gene flow. Nat Rev Microbiol. 2010;8: 552–563.
- 786 54. Ghinet MG, Bordeleau E, Beaudin J, Brzezinski R, Roy S, Burrus V. Uncovering the  
787 prevalence and diversity of integrating conjugative elements in actinobacteria. PLoS One.  
788 2011;6: e27846.
- 789 55. Subramanya HS, Arciszewska LK, Baker RA, Bird LE, Sherratt DJ, Wigley DB. Crystal  
790 structure of the site-specific recombinase, XerD. EMBO J. 1997;16: 5178–5187.
- 791 56. Hamilton CM, Lee H, Li PL, Cook DM, Piper KR, von Bodman SB, et al. TraG from RP4  
792 and TraG and VirD4 from Ti plasmids confer relaxosome specificity to the conjugal transfer  
793 system of pTiC58. J Bacteriol. 2000;182: 1541–1548.
- 794 57. te Poele EM, Bolhuis H, Dijkhuizen L. Actinomycete integrative and conjugative elements.  
795 Antonie Van Leeuwenhoek. 2008;94: 127–143.
- 796 58. Bordeleau E, Ghinet MG, Burrus V. Diversity of integrating conjugative elements in  
797 actinobacteria: Coexistence of two mechanistically different DNA-translocation systems.

- 798 Mob Genet Elements. 2012;2: 119–124.
- 799 59. Burrus V, Waldor MK. Shaping bacterial genomes with integrative and conjugative  
800 elements. *Res Microbiol.* 2004;155: 376–386.
- 801 60. Robinson RK. *Dairy Microbiology Handbook: The Microbiology of Milk and Milk Products.*  
802 Wiley; 2005.
- 803 61. Keeling PJ, Palmer JD. Horizontal gene transfer in eukaryotic evolution. *Nat Rev Genet.*  
804 2008;9: 605–618.
- 805 62. Cordero OX, Ventouras L-A, DeLong EF, Polz MF. Public good dynamics drive evolution of  
806 iron acquisition strategies in natural bacterioplankton populations. *Proc Natl Acad Sci U S*  
807 *A.* 2012;109: 20059–20064.
- 808 63. Verschuere L, Rombaut G, Sorgeloos P, Verstraete W. Probiotic bacteria as biological  
809 control agents in aquaculture. *Microbiol Mol Biol Rev. Am Soc Microbiol;* 2000;64: 655–671.
- 810 64. Chaucheyras-Durand F, Durand H. Probiotics in animal nutrition and health. *Benef*  
811 *Microbes.* 2010;1: 3–9.
- 812 65. Cuello-Garcia CA, Brożek JL, Fiocchi A, Pawankar R, Yepes-Nuñez JJ, Terracciano L, et  
813 al. Probiotics for the prevention of allergy: A systematic review and meta-analysis of  
814 randomized controlled trials. *J Allergy Clin Immunol. Elsevier;* 2015;136: 952–961.
- 815 66. Onubi OJ, Poobalan AS, Dineen B, Marais D, McNeill G. Effects of probiotics on child  
816 growth: a systematic review. *J Health Popul Nutr. jhpn.biomedcentral.com;* 2015;34: 8.
- 817 67. McKenzie YA, Thompson J, Gulia P, Lomer M. British Dietetic Association systematic  
818 review of systematic reviews and evidence-based practice guidelines for the use of  
819 probiotics in the management of irritable bowel syndrome in adults (2016 update). *J Hum*  
820 *Nutr Diet. Wiley Online Library;* 2016; Available:  
821 <http://onlinelibrary.wiley.com/doi/10.1111/jhn.12386/full>
- 822 68. Whitlock DR, Jamas S, Weiss L. Ammonia oxidizing bacteria for treatment of acne  
823 [Internet]. US Patent. 20160151427:A1, 2016. Available:  
824 <https://www.google.com/patents/US20160151427>
- 825 69. Sanders ME, Akkermans LMA, Haller D, Hammerman C, Heimbach J, Hörmannspurger G,  
826 et al. Safety assessment of probiotics for human use. *Gut Microbes.* 2010;1: 164–185.
- 827 70. Gyles C, Boerlin P. Horizontally transferred genetic elements and their role in pathogenesis  
828 of bacterial disease. *Vet Pathol.* 2014;51: 328–340.
- 829 71. Richards TA, Soanes DM, Foster PG, Leonard G, Thornton CR, Talbot NJ. Phylogenomic  
830 analysis demonstrates a pattern of rare and ancient horizontal gene transfer between  
831 plants and fungi. *Plant Cell.* 2009;21: 1897–1911.
- 832 72. Bankevich A, Nurk S, Antipov D, Gurevich AA, Dvorkin M, Kulikov AS, et al. SPAdes: a new  
833 genome assembly algorithm and its applications to single-cell sequencing. *J Comput Biol.*  
834 2012;19: 455–477.
- 835 73. Markowitz VM, Chen I-MA, Palaniappan K, Chu K, Szeto E, Grechkin Y, et al. IMG: the

- 836 Integrated Microbial Genomes database and comparative analysis system. *Nucleic Acids*  
837 *Res.* 2012;40: D115–22.
- 838 74. Bonham KS, Wolfe BE, Dutton RJ. Datasets associated with Bonham et al. | Zenodo  
839 [Internet]. Extensive Horizontal Gene Transfer in Cheese-Associated Bacteria. 2016.  
840 doi:10.5281/zenodo.163212
- 841 75. Nawrocki EP, Eddy SR. Infernal 1.1: 100-fold faster RNA homology searches.  
842 *Bioinformatics.* 2013;29: 2933–2935.
- 843 76. Cole JR, Wang Q, Cardenas E, Fish J, Chai B, Farris RJ, et al. The Ribosomal Database  
844 Project: improved alignments and new tools for rRNA analysis. *Nucleic Acids Res.* 2009;37:  
845 D141–5.
- 846 77. Guindon S, Gascuel O. A simple, fast, and accurate algorithm to estimate large  
847 phylogenies by maximum likelihood. *Syst Biol.* 2003;52: 696–704.
- 848 78. Letunic I, Bork P. Interactive tree of life (iTOL) v3: an online tool for the display and  
849 annotation of phylogenetic and other trees. *Nucleic Acids Res.* 2016;44: W242–5.
- 850 79. David LA, Maurice CF, Carmody RN, Gootenberg DB, Button JE, Wolfe BE, et al. Diet  
851 rapidly and reproducibly alters the human gut microbiome. *Nature.* 2014;505: 559–563.
- 852 80. McClure R, Balasubramanian D, Sun Y, Bobrovskyy M, Sumbly P, Genco CA, et al.  
853 Computational analysis of bacterial RNA-Seq data. *Nucleic Acids Res.* 2013;41: e140–  
854 e140.
- 855 81. Camacho C, Coulouris G, Avagyan V, Ma N, Papadopoulos J, Bealer K, et al. BLAST+:  
856 architecture and applications. *BMC Bioinformatics.* 2009;10: 421.
- 857 82. Bonham KS. Kvasir: Release for Publication [Internet]. Zenodo; 2016.  
858 doi:10.5281/zenodo.53899
- 859

Figure 1: figure supplement 1

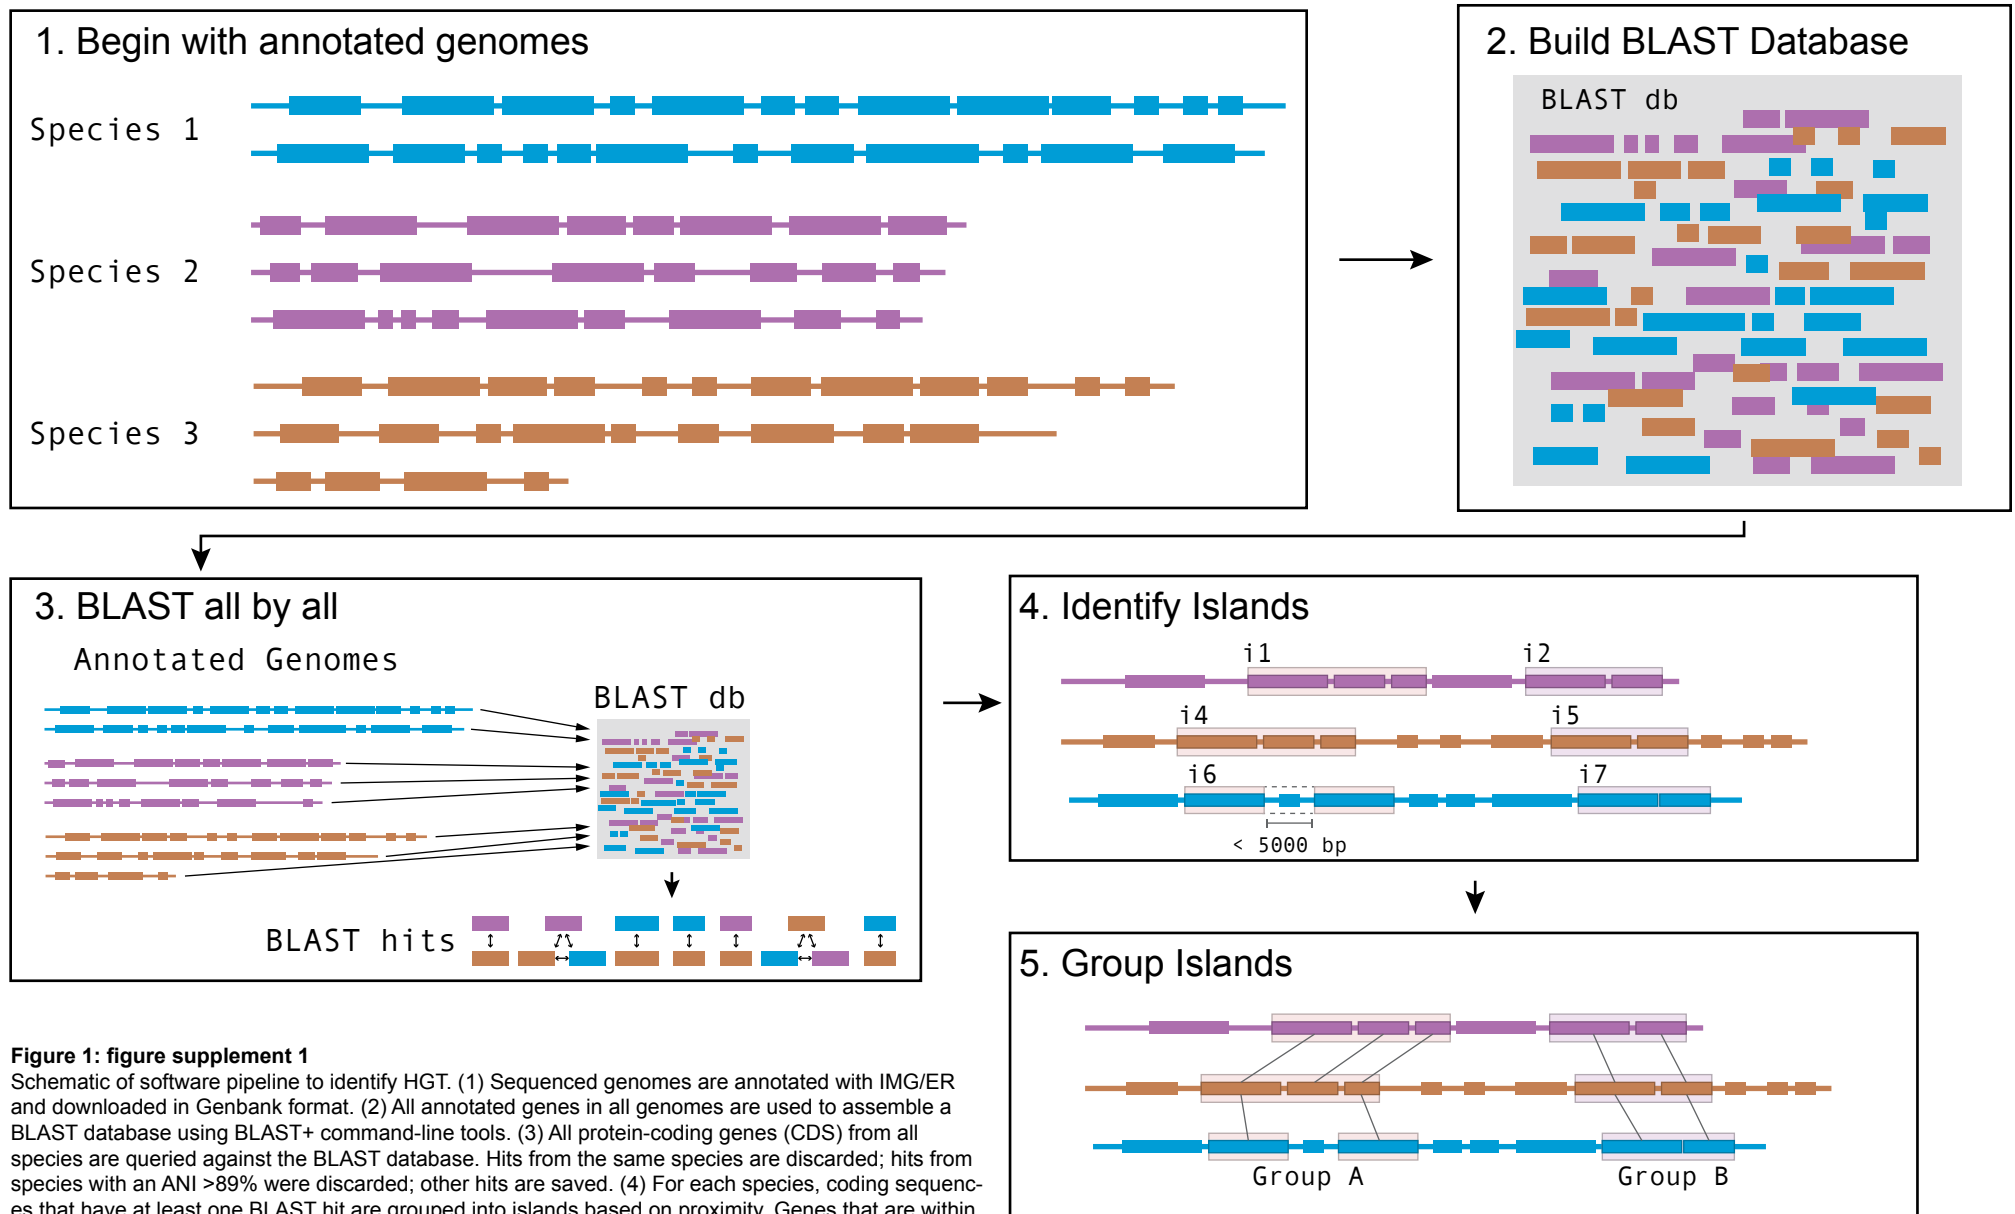

Figure 1: figure supplement 1

Schematic of software pipeline to identify HGT. (1) Sequenced genomes are annotated with IMG/ER and downloaded in Genbank format. (2) All annotated genes in all genomes are used to assemble a BLAST database using BLAST+ command-line tools. (3) All protein-coding genes (CDS) from all species are queried against the BLAST database. Hits from the same species are discarded; hits from species with an ANI >89% were discarded; other hits are saved. (4) For each species, coding sequences that have at least one BLAST hit are grouped into islands based on proximity. Genes that are within 5kb of each other on the same contig are considered part of the same island. (5) Islands in each species are compared to islands in each other species to form groups. Islands that share at least 1 gene in common according to BLAST parameters in step 3 are placed in the same group.

## Figure 1: figure supplement 2

Tree scale: 1

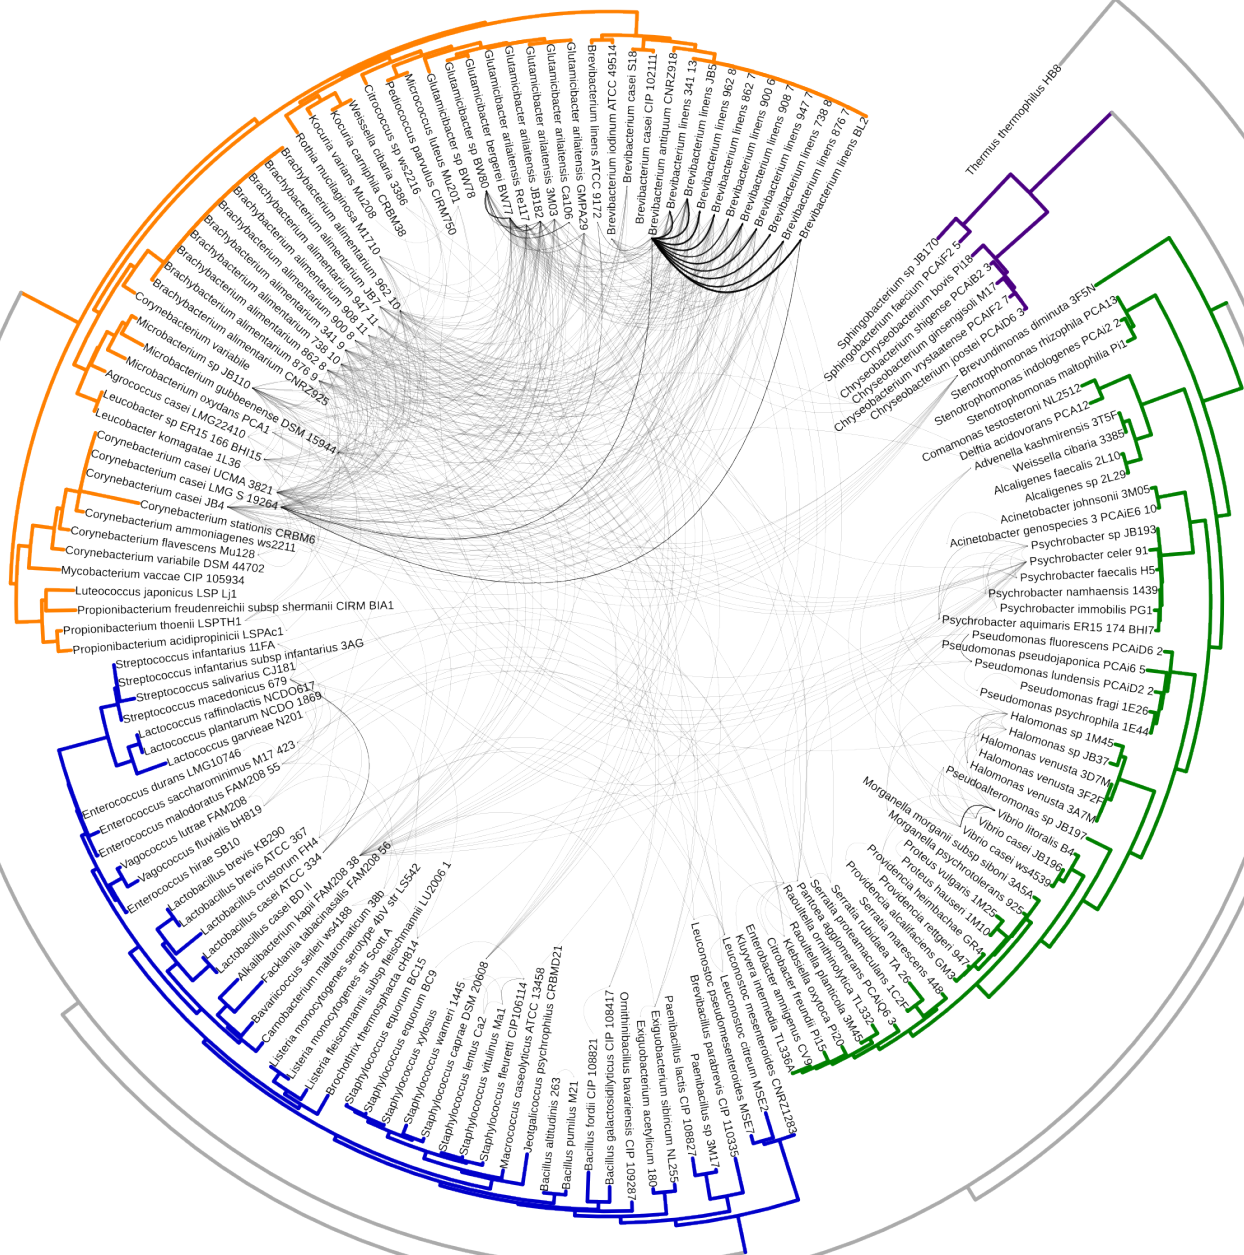

**Figure 1: figure supplement 2**

Same as Figure 1A with branch labels. All HGT events in analyzed cheese-associated bacteria. Connection thickness is scaled to # of shared protein coding sequences. Phylogenetic tree based on 16S RNA alignment using Ribosomal Database Project (RDP).

Figure 2: figure supplement 2

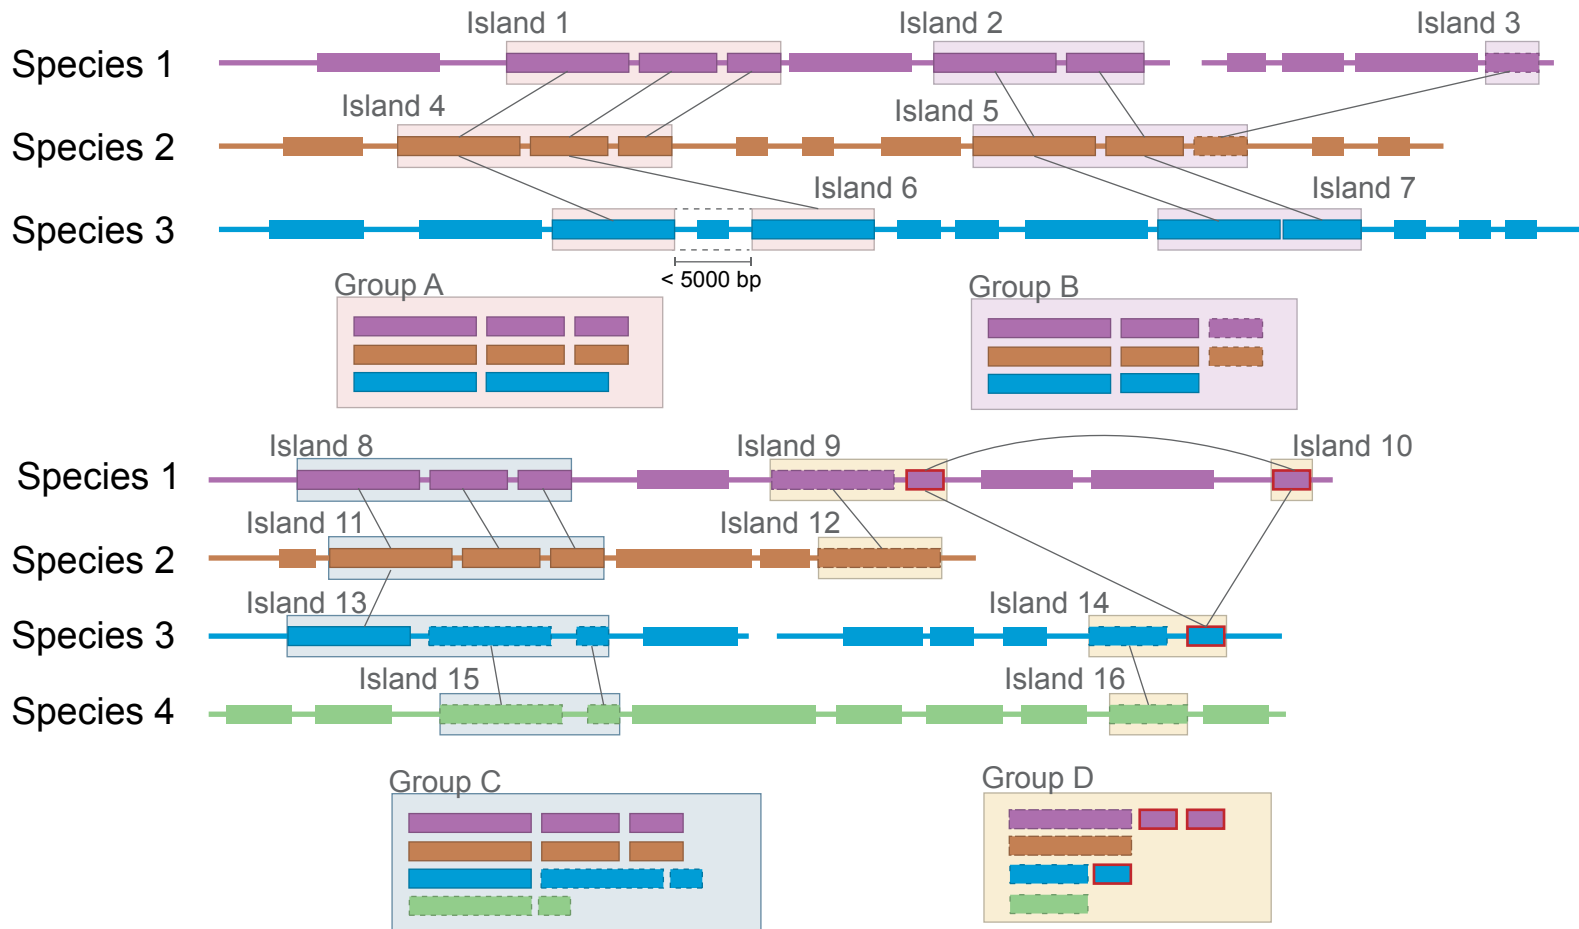

**Figure 2: figure supplement 2**

Group A: Expected clustering: contiguous genes in multiple species are in a single group. Though island 6 (i6) lacks one gene present in i1 and i4, (possibly because of a transposon insertion), it is still considered related. Group B: Ambiguous grouping: Islands 2 and 3 from species 1 are found on different contigs, but are grouped together. They may be found in close proximity in the genome, but on different sides of a gap in the assembly, or they may be quite distant from each other. The grouping of related genes in species 2 into a single island suggests that they may have been transferred in a single event, but the possibility of two unrelated HGT events landing in the same spot cannot be excluded. Group C: Possible mis-grouping of two HGT events in a single group: Though species 4 does not share any genes with species 1 and 2, these islands are nevertheless clustered due to the proximity of coding sequences in species 3. This may correctly represent a single gene cluster that subsequently diverged in each species, or unrelated HGT that happened to insert in close proximity. Group D: Mis-grouping due to mobile element: Mobile elements (outlined in red) found in multiple locations in multiple genomes may insert next to unrelated HGT islands, causing spurious grouping by the algorithm.

## Supplementary Figure 2

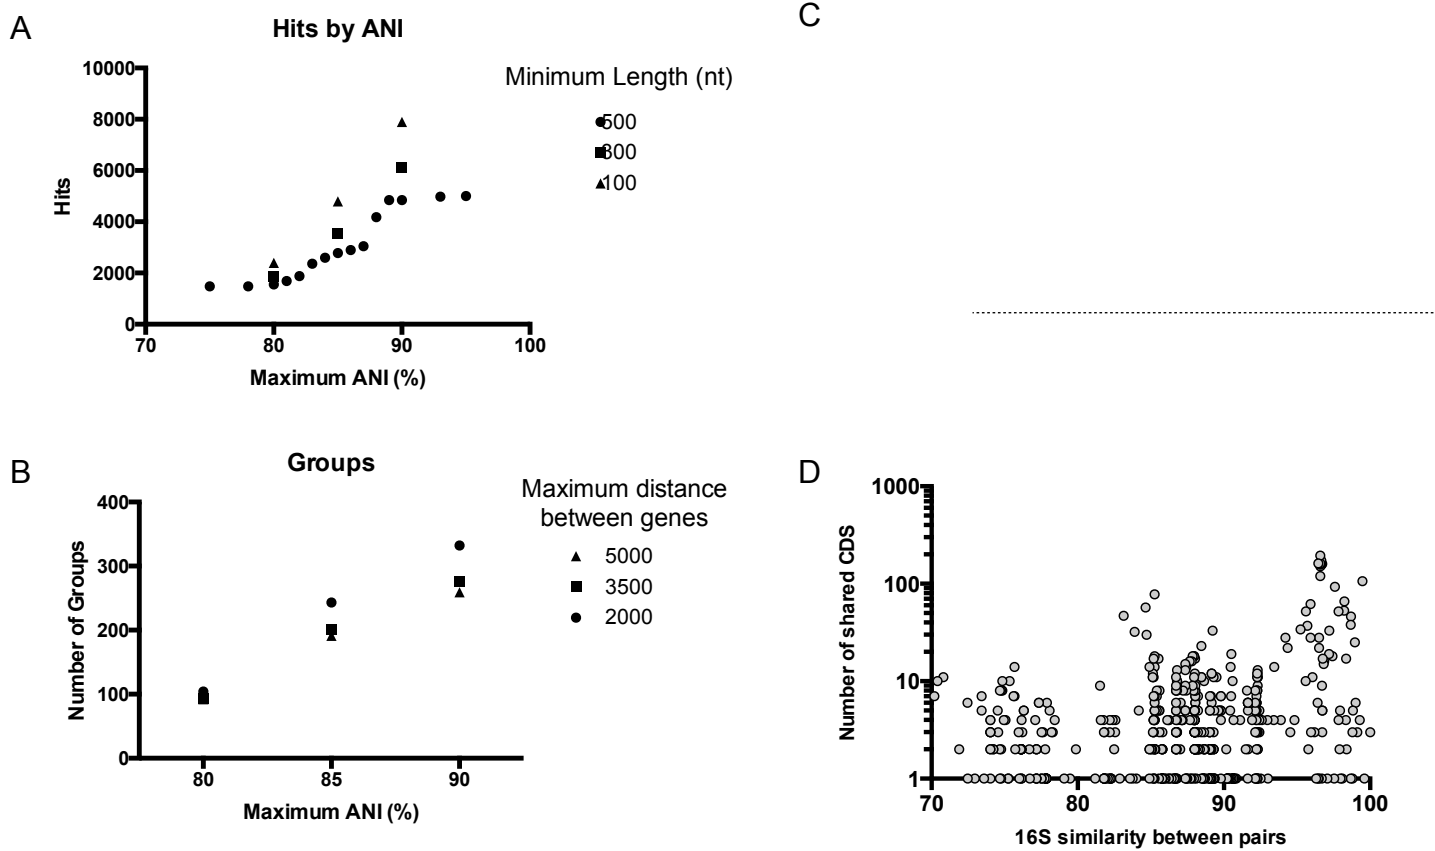

Source: https://www.biorxiv.org/content/10.1101/079137v3.full.pdf
